1 **Short title:** MdPAT16 regulates sugar through palmitoylation.

2 **Corresponding authors:**

3 Yu-Jin Hao (haoyujin@sdau.edu.cn)

4 Tel: +86-538-824-6692

5 Fax number: +86-538-824-2364

6 Address: College of Horticulture Science and Engineering, Shandong Agricultural  
7 University, Tai-An, Shandong

8

9 **The apple palmitoyltransferase MdPAT16 regulates sugar content via an**  
10 **MdCBL1-MdCIPK13-MdSUT2.2 pathway**

11 Han Jiang<sup>1</sup>, Qi-Jun Ma<sup>2</sup>, Ming-Shuang Zhong<sup>2</sup>, Huai-Na Gao<sup>2</sup>, Yuan-Yuan Li<sup>2</sup>, Yu-Jin  
12 Hao<sup>2,\*</sup>

13 <sup>1</sup>State Key Laboratory of Crop Stress Biology for Arid Areas, College of Horticulture, Northwest  
14 A&F University, Yangling, Shaanxi 712100, China

15 <sup>2</sup>State Key Laboratory of Crop Biology, National Research Center for Apple Engineering and  
16 Technology, Shandong Collaborative Innovation Center of Fruit & Vegetable Quality and Efficient  
17 Production, College of Horticulture Science and Engineering, Shandong Agricultural University,  
18 Tai'an, Shandong 271018, China.

19 \*Corresponding authors: Yu-Jin Hao (haoyujin@sdau.edu.cn)

20 **One-sentence summary:** Under appropriate salt stress, MdCBL1 was palmitoylation  
21 stabilized by MdPAT16 to promote sugar accumulation via an  
22 MdCBL1-MdCIPK13-MdSUT2.2 pathway.

23 **Author contributions:** Y.-J.H. and H.J. planned and designed the research. H.J.,  
24 Q.-J.M., M.-S.Z., H.-N.G., performed experiments, conducted fieldwork, analyzed  
25 data etc. H.J., Y.-Y.L., and Y.-J.H wrote the manuscript.

## 26 ABSTRACT

27 Protein palmitoylation, a post-translational protein modification, plays an important  
28 role in the regulation of substrate protein stability, protein interactions, and protein  
29 localization. It is generally believed that there are two mechanisms of palmitoylation:  
30 one by acyl-CoA and the other by protein acyltransferase (PAT). In this study, an  
31 MdPAT family member, MdPAT16, was identified and shown to have  
32 palmitoyltransferase activity. We found that this gene responded to salt stress and that  
33 its expression improved plant salt resistance. MdPAT16 was shown to interact with  
34 MdCBL1 and stabilize MdCBL1 protein levels through palmitoylation. MdPAT16  
35 further regulated apple sugar content by stabilizing the MdCIPK13-MdSUT2.2  
36 protein complex. We found that the N-terminal sequence of MdCBL1 contains a  
37 palmitoylation site and that the N-terminal deletion of MdCBL1 leads to changes in  
38 protein stability and subcellular localization. Finally, exogenous salt stress increased  
39 the interaction of MdPAT16 with MdCBL1 and the sugar content in apple. These  
40 findings suggest that MdPAT16 functions as a stable means for the palmitoylation of  
41 downstream protein. It may be a missing link in the plant salt stress response pathway  
42 and have an important impact on fruit quality.

43

44 **Key words:** MdPAT, Palmitoylation, Sugar accumulation, *Malus domestica*

45

## 46 INTRODUCTION

47 Sugars play multiple important roles in diverse biological processes, such as  
48 physiological metabolism, growth, and developmental stage transitions. Sugars not  
49 only supply energy for plant growth and development, but also act as important  
50 determinants of fruit quality and commodity value. The content, type, and ratio of  
51 sugars directly or indirectly determine fruit flavor, color, and other quality traits.  
52 Sugars also function as signaling molecules to regulate flowering time, nitrogen

53 metabolism, anthocyanin accumulation, and other processes in various plant species  
54 (Ohto et al., 2001; Jonassen et al., 2008; Sun et al., 2019; Hu et al., 2016; Liu et al.,  
55 2019).

56 Sugars are also used for osmotic adjustment in response to various abiotic  
57 stresses. Salinity, drought, and low temperature usually result in the accumulation of  
58 sugars (Krasensky et al., 2012). Under long-term salt stress, plants enhance their salt  
59 tolerance in response to dehydration and osmotic stress (Chaves et al., 2009). Early  
60 salt stress is similar to drought and is mainly affected by ion toxicity and osmotic  
61 stress. Therefore, increasing plant tolerance to the early stages of salt stress mainly  
62 involves preventing salt from entering the cytoplasm and lowering cell water potential  
63 through osmotic adjustment (Sultana et al., 1999; Parida and Das, 2005; Munns and  
64 Tester, 2008). The sugars produced by photosynthesis provide necessary energy for  
65 the growth and development of tissues in response to environmental stimulation (Lv  
66 et al., 2008; Yao et al., 2010). When sugars accumulate to a relatively high level in the  
67 vacuole, this produces a high bloating pressure (Gibson, 2005; Moustakas et al., 2011;  
68 Rasheed et al., 2011). Therefore, sugars also affect osmotic potential and participate in  
69 the response to water and salt stresses.

70 In *Arabidopsis*, sugars participate in abiotic stress responses by affecting osmotic  
71 potential, and increased contents of soluble sugar, anthocyanins, and proline occur  
72 under stress (Moustakas et al., 2011). In wheat, the contents of glucose, fructose,  
73 sucrose, and fructan increase significantly under drought or salt stress (Kerepesi et al.,  
74 2000). In apple, the CBL-interacting protein kinase (CIPK) MdCIPK22 interacts with  
75 and phosphorylates the sucrose transporter MdSUT2.2 to mediate drought tolerance  
76 and sugar accumulation (Ma et al., 2019a). The ABA-related transcription factor  
77 MdAREB2 directly binds to the promoter of MdSUT2.2, which plays an important  
78 role in ABA-induced sugar accumulation (Ma et al., 2017a). Meanwhile, MdCIPK22  
79 also interacts with and phosphorylates MdAREB2, thereby promoting its transcription  
80 (Ma et al., 2017b). Therefore, MdCIPK22 both directly and indirectly regulates the  
81 downstream protein MdSUT2.2 and sugar accumulation in apple. Another CIPK

82 family gene, MdCIPK13, may also regulate sugar content and salt tolerance (Ma et al.,  
83 2019b). However, the upstream regulatory pathways for MdCIPK13 in response to  
84 salt stress remain unclear.

85 S-acylation, also called S-palmitoylation, involves the binding of a 16-carbon  
86 palmityl group to a specific protein cysteine residue through a thioester bond.  
87 S-palmitoylation regulates dynamic membrane localization, stability, and transport of  
88 proteins between different cellular compartments. It also regulates protein function  
89 and protein-protein interactions. Although the mechanism of palmitoylation remains  
90 unclear in plants (Hemsley et al., 2013), it is well known that palmitoylation occurs in  
91 different membrane structures, such as the endoplasmic reticulum (Batistič et al.,  
92 2008), Golgi (Zeng et al., 2007), the plasma membrane (Sorek et al., 2007), and the  
93 tonoplast (Batistič, et al., 2012; Zhou et al., 2013). Palmitoylation of proteins also  
94 occurs spontaneously without enzyme catalysis. However, in this process, a large  
95 number of reaction substrates must be provided (Bizzozero et al., 1987; Duncan and  
96 Gilman, 1996). As organisms fail to provide such large amounts of substrate,  
97 spontaneous protein palmitoylation is unlikely to occur *in vivo*. The common  
98 understanding is that protein palmitoylation is catalyzed by a series of enzymes called  
99 protein S-acyl transferases (PATs) (Batistič, et al., 2012; Zhou et al., 2013).

100 Palmitoyl transferase was initially discovered in *Saccharomyces cerevisiae*, and it  
101 has been extensively studied in mammals and yeast (Sun et al., 2004; LaGrassa and  
102 Ungermann, 2005). The first PAT function genes to be characterized were the  
103 Erf2-Erf4 complex and Ark1, which promote palmitoylation of yeast Ras2 protein and  
104 Yck2 (yeast casein kinase 2) kinase, respectively (Feng and Davis, 2000; Qi et al.,  
105 2014). Both Erf2 and Ark1 have a conserved DHHC (Asp-His-His-Cys) motif in the  
106 cysteine residue aggregation domain (CRD), as well as zinc finger structural features  
107 (González-Siso et al., 2009; Hou et al., 2005; Ohno et al., 2006; Subramanian et al.,  
108 2006). Generally, proteins rich in DHHC motifs have PAT activity. These motifs are  
109 important not only for PAT activity, but also for palmitoylation of the DHHC protein  
110 itself (Qi et al., 2014).

111 In plants, the first reported palmitoyl transferase was TIP1 (TIP GROWTH  
112 DEFECTIVE 1) in Arabidopsis. It is a member of the palmitoyl transferase family  
113 with an ankyrin repeat sequence and is generally expressed in roots, leaves,  
114 inflorescence stems, and flowers. TIP1 regulates protein hydrophobicity and affects  
115 protein-membrane binding, signal transduction, and intracellular vesicle trafficking  
116 (Hemsley et al., 2005). In addition, another Arabidopsis palmitoyltransferase,  
117 *AtPAT10*, has palmitoyltransferase activity and participates in the regulation of cell  
118 expansion and cell division. It also enhances reproductive capacity (Qi et al., 2014).  
119 The *AtPAT10* protein localizes to the Golgi apparatus and the tonoplast (Qi et al.,  
120 2013; Zhou et al., 2013). The phenotypes of three *AtPAT10* T-DNA insertion mutants  
121 are consistent and include defects in cell expansion and cell division, as well as  
122 hypersensitivity to salt stress. *AtCBL2* and *AtCBL3* have been identified as potential  
123 substrates of *AtPAT10* and shown to regulate salt tolerance (Zhou et al., 2013).  
124 However, it remains unclear how PATs regulate sugar accumulation in response to salt  
125 stress.

126 In this study, a palmitoyltransferase family member, *MdPAT16*, was identified in  
127 apple. Functional complementation and S-acylation experiments demonstrated that  
128 *MdPAT16* has palmitoyltransferase activity, and subsequent experiments  
129 characterized its functions in sugar accumulation and salt stress tolerance. Its  
130 interacting protein *MdCBL1* was also identified and characterized. Finally, the  
131 response of *MdPAT16* to salt stress and its interactions with *MdCBL1* to regulate  
132 sugar accumulation and modulate salt tolerance were characterized.

133

134

135 **RESULTS**

136 **MdPAT16 promotes sugar accumulation and enhances salt tolerance**

137 Esculin staining of roots demonstrated that an appropriate concentration of NaCl  
138 clearly promoted sucrose transferase activity in apple roots, thereby increasing plant  
139 sugar content (Fig. S1). RNA-seq analysis further demonstrated that numerous genes  
140 associated with sugar biosynthesis and transportation were markedly upregulated. In  
141 addition to sugar-associated genes, the PAT family member *MdPAT16* was also  
142 transcriptionally upregulated in response to NaCl treatment (Fig. 1).

143 To further characterize the function of *MdPAT16* in response to salt stress, a  
144 pMdPAT16-GUS vector was transiently transformed into apple shoot cultures. The  
145 transgenic shoot cultures were then treated with NaCl or H<sub>2</sub>O. After GUS staining,  
146 NaCl-treated shoot cultures exhibited higher GUS activity than water-treated controls  
147 (Fig. S2). To further verify that MdPAT16 functions in salt-induced sugar  
148 accumulation, *Agrobacterium rhizogenes*-mediated genetic transformation was  
149 performed to obtain MdPAT16 overexpression and suppression transgenic roots. Two  
150 weeks after NaCl treatment, MdPAT16-OVX roots grew much better and  
151 MdPAT16-Anti roots grew poorly compared with the empty vector (WT) controls, as  
152 indicated by lateral root number, root length, and root surface area (Fig. 2A–C).

153 Esculin staining was performed to examine sucrose transport activity in the  
154 different transgenic roots. MdPAT16-OVX roots exhibited much stronger blue  
155 fluorescence than the WT controls, indicating that MdPAT16 overexpression  
156 promoted sucrose transport activity. NaCl treatment further enhanced the fluorescence  
157 intensity (Fig. 2 E,F). Sugar contents were also measured, and MdPAT16-OVX roots  
158 accumulated much more glucose, sucrose, and soluble sugars than the WT controls,  
159 whereas MdPAT-Anti accumulated less (Fig. 2D).

160 To further examine whether MdPAT16 improves sugar accumulation, TRV viral  
161 vectors were used for transient overexpression and suppression (Yuval et al., 2007).

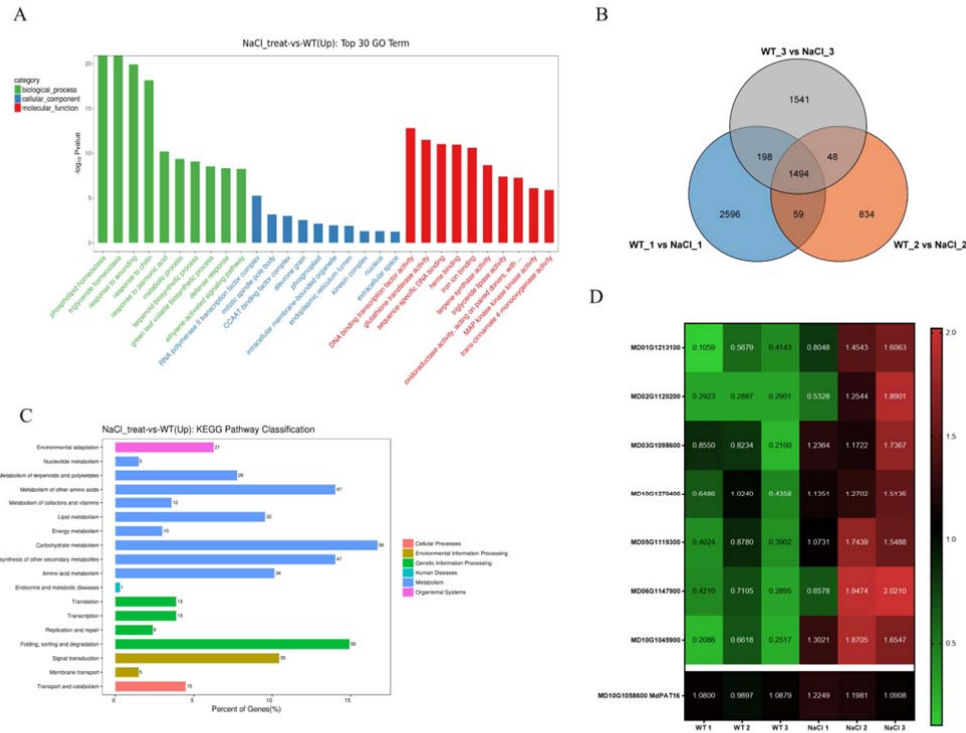

**Figure 1. RNAseq analysis of GL-3 tissue culture seedlings with and without NaCl treatment.**

(A) Gene ontology enrichment of upregulated genes in NaCl-treated and WT seedlings, presented according to  $-\log_{10}P$ -value. (B) Venn diagram of the genes upregulated in NaCl-treated and WT seedlings ( $\log_2\text{FoldChange} > 2$ ). (C) KEGG pathway classification of upregulated genes. (D) Normalized heatmap of sugar-related genes, including amino sugar and nucleotide sugar metabolism(MD01G1213100,MD02G1120200), starch and sucrose metabolism(MD03G1098600, MD10G1270400), sucrose transmembrane transporter(MD10G1045900), salt stress response (MD05G1119300, MD06G1147900), and MdPAT16(MD10G1058600).

162 MdPAT16-TRV was transiently transformed into Gala shoot cultures to inhibit the  
 163 expression of MdPAT16. The resultant transgenic shoot cultures were used to detect  
 164 starch content through iodine staining. MdPAT16 silencing increased starch  
 165 accumulation but decreased soluble sugar contents (Fig. 3A,B). Subsequently, a VIGS  
 166 experiment was conducted using apple fruits, and the results were the same as those  
 167 obtained in apple roots and seedlings (Fig. 3C,D). These results suggested that  
 168 MdPAT16 responded to salt stress, improved plant salt resistance, and increased sugar  
 169 content.

170 To further characterize its function *in planta*, MdPAT16 was genetically  
 171 transformed into Arabidopsis. Esculin staining demonstrated that ectopic expression  
 172 of MdPAT16 enhanced fluorescence intensity compared with the WT control. As a

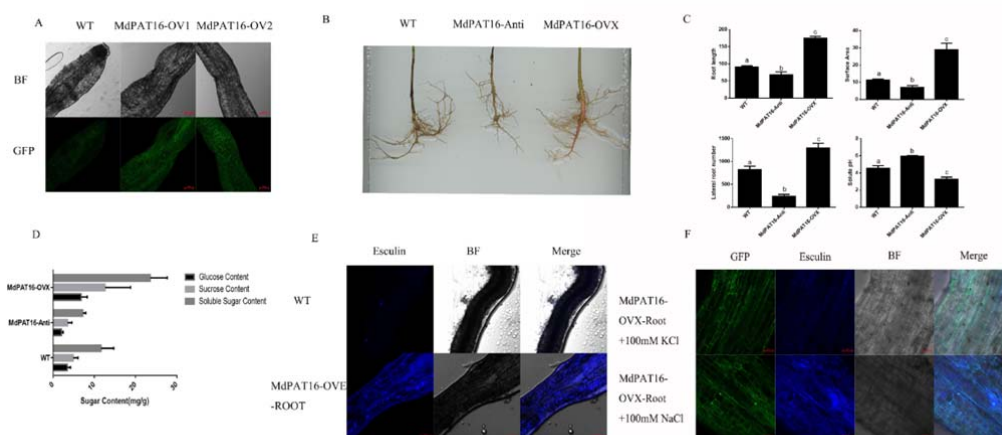

**Figure 2. MdPAT16 functions as a positive regulator under salt stress.** (A) Root fluorescence identification of MdPAT16 overexpression transgenic roots (Bars = 100  $\mu$ m). (B) and (C) Root scan analysis of root shape, root length, surface area, and lateral root number of WT, MdPAT16-OVX, and MdPAT16-anti transgenic roots. Results are given as mean  $\pm$  SD. Letters indicate significant differences (*t*-test,  $P < 0.01$ ) (D) Glucose, sucrose, and soluble sugar contents of WT, MdPAT16-OVX, and MdPAT16-anti transgenic roots. (E) and (F) Esculin staining of sucrose transport activity in (E) WT and MdPAT16-OVX transgenic roots, and (F) MdPAT16-OVX roots treated with NaCl and KCl (Bars = 100  $\mu$ m).

173 result, ectopic transgenic lines generated more sugars than the WT controls.  
 174 MdPAT16 ectopic expression also promoted salt tolerance in transgenic *Arabidopsis*  
 175 (Fig. S3).

176 Taken together, these results indicate that *MdPAT16* plays a crucial role in sugar  
 177 accumulation in response to salt stress and positively regulates salt tolerance.

178

## 179 MdPAT16 is an S-palmitoyltransferase

180 A phylogenetic tree and a sequence alignment analysis demonstrated that  
 181 *MdPAT16* is a member of the PAT gene family and that PAT16 sequences are highly  
 182 conserved among different plant species (Figs. S4,S5). The yeast mutant *akr1p*, which  
 183 is deficient in palmitoyltransferase activity, was used to determine whether MdPAT16  
 184 has palmitoylation activity. An MdPAT16-pYES2 expression vector was constructed  
 185 and genetically transformed into the *akr1p* mutant and the WT strain BY4741, and the  
 186 empty vector was used as a control. MdPAT16 ectopic expression in the *akr1p* mutant  
 187 recovered its palmitoyltransferase deficiency phenotype, whereas expression of the  
 188 empty vector did not. However, MdPAT16 ectopic expression in the *akr1p* mutant



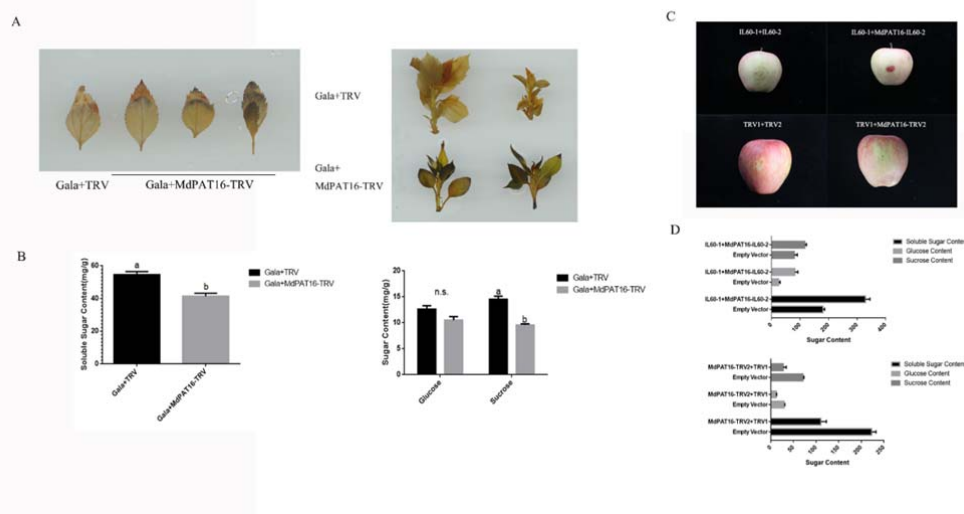

**Figure 3. Overexpression of apple MdPAT16 increases soluble sugar content.** (A) Starch staining of MdPAT16-TRV transient suppression Gala tissue culture seedlings and Empty Vector controls. (B) Soluble sugar, glucose, and sucrose contents of MdPAT16-TRV and Empty Vector controls. (C) and (D) visible anthocyanin accumulation conditions (C) and soluble sugar, glucose, and sucrose contents (D) of apple fruits from MdPAT16-IL60 (overexpression), MdPAT16-TRV (suppression) and Empty Vector controls.

189 failed to recover its temperature sensitive phenotype.

190 A mutation from cysteine (Cys) to alanine (Ala) was created in the DHHC-CRD  
 191 domain of MdPAT16 to produce MdPAT16<sup>C244A</sup>, and MdPAT16<sup>C244A</sup> lost the ability to  
 192 complement the palmitoyltransferase deficiency phenotype (Fig. 4A).

193 The shapes of yeast cells under different treatments were observed with an  
 194 LSM880 high resolution laser confocal microscope, and quantitative statistics were  
 195 used to analyze the the percentage of cells that had an altered shape. Observations  
 196 showed that the expression of MdPAT16 in *akr1p* yeast cells produced a full oval  
 197 shape similar to that of WT BY4741, whereas *akr1p* yeast cells that expressed  
 198 MdPAT16<sup>C244A</sup> exhibited a long rod shape. These observations suggested that  
 199 MdPAT16 rescued the phenotype of *akr1p* and that this rescue required the cysteine  
 200 residue of the DHHC catalytic site (Fig. 4B,C). Finally, an ABE (Acyl-Biotin  
 201 Exchange) assay demonstrated that MdPAT16 had the capacity to palmitoylate itself  
 202 (Fig. 4D). These observations strongly suggest that MdPAT16 is an  
 203 S-palmitoyltransferase.

204

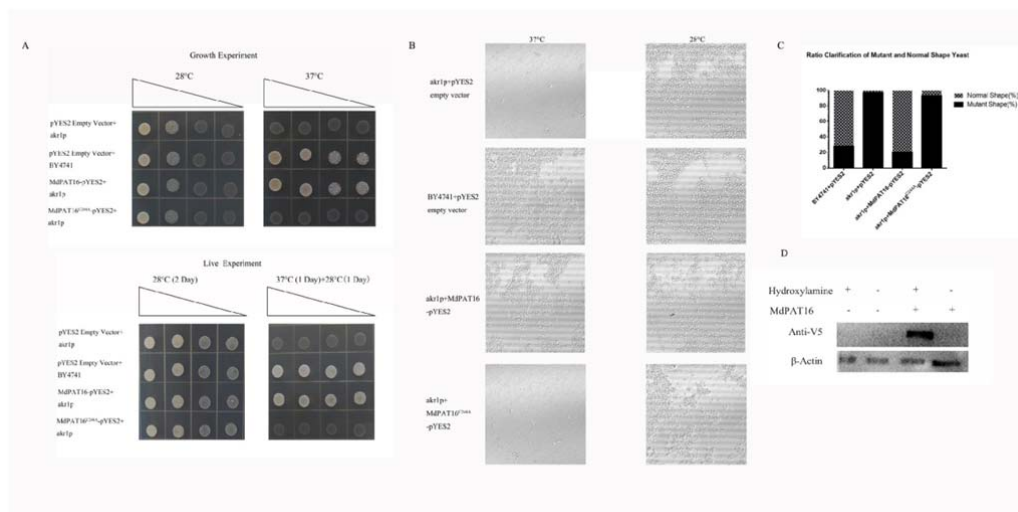

## 205 MdPAT16 interacts with the calcineurin B subunit protein MdcBL1

206 To identify MdPAT16-interacting proteins *in planta*, total protein was extracted  
 207 from 35S::MdPAT16-GFP and 35S::GFP transgenic apple calli for  
 208 co-immunoprecipitation (Co-IP) assays. The IPed proteins were analyzed with mass  
 209 spectrometry, and several identified peptides were parts of a calcineurin B subunit  
 210 protein homologous to CBL1, hereafter named MdcBL1. Subsequently,  
 211 35S::MdPAT16-GFP/MdcBL1-HA and MdPAT16-GFP/HA double transgenic apple  
 212 calli were obtained to verify the proteins' interaction *in vivo* using Co-IP. The results  
 213 showed that MdPAT16 interacted with MdcBL1 (Fig. 5A). Furthermore, both *in vitro*  
 214 pull-down assays and bimolecular fluorescence complementarity (BiFC) assays  
 215 confirmed the *in vitro* and *in vivo* interaction between MdcBL1 and MdPAT16 (Fig.  
 216 5B,C).

217 Next, a dual-luciferase reporter system was used to determine whether NaCl  
 218 treatment influenced the interaction between MdPAT16 and MdcBL1. Full-length  
 219 cDNAs of MdPAT16 and MdcBL1 were fused to the N- and C-terminals of the  
 220 binary fluorescent vector, respectively. Fluorescence observations demonstrated that

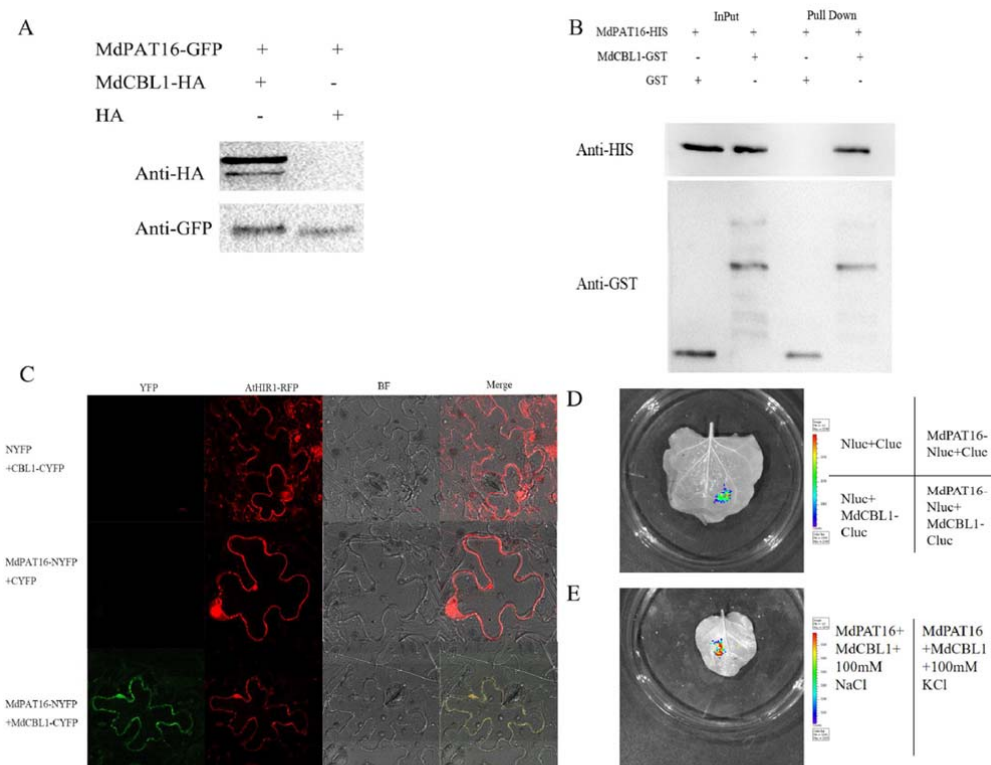

**Figure 5. MdCBL1 is a direct substrate of MdPAT16.** (A) *in vivo* Co-IP assays between MdPAT16 and MdCBL1 by western blotting with anti-HA and anti-GFP antibodies. (B) *in vitro* GST pull-down assays with MdPAT16-HIS and MdCBL1-GST. Proteins immunoprecipitated with GST-beads were detected using anti-HIS antibody. (C) BiFC was performed to test the interaction between MdPAT16 and MdCBL1, and AHIR1-RFP was co-injected as a plasma membrane marker. Bars = 10  $\mu$ m. (D) and (E) The interaction between MdPAT16 and MdCBL1 was visualized with a dual-luciferase reporter system (D) and fluorescence activity was observed with and without NaCl (E).

221 the luciferase activity around the MdPAT16-Nluc and MdCBL1-Cluc co-injection site  
 222 was much higher than that observed in the empty vector control, further confirming  
 223 the interaction between MdPAT16 and MdCBL1 (Fig. 5D). Subsequently, 100mM  
 224 KCl or 100mM NaCl was added to the injection solution and co-injected with  
 225 MdPAT16-Nluc and MdCBL1-Cluc. Compared with the KCl treatment, the NaCl  
 226 treatment clearly promoted the interaction between MdPAT16 and MdCBL1 (Fig.  
 227 5E).

228

## 229 MdPAT16 palmitoylates MdCBL1 to determine its subcellular localization and 230 protein stability

231 To determine whether MdPAT16 palmitoylates MdCBL1,

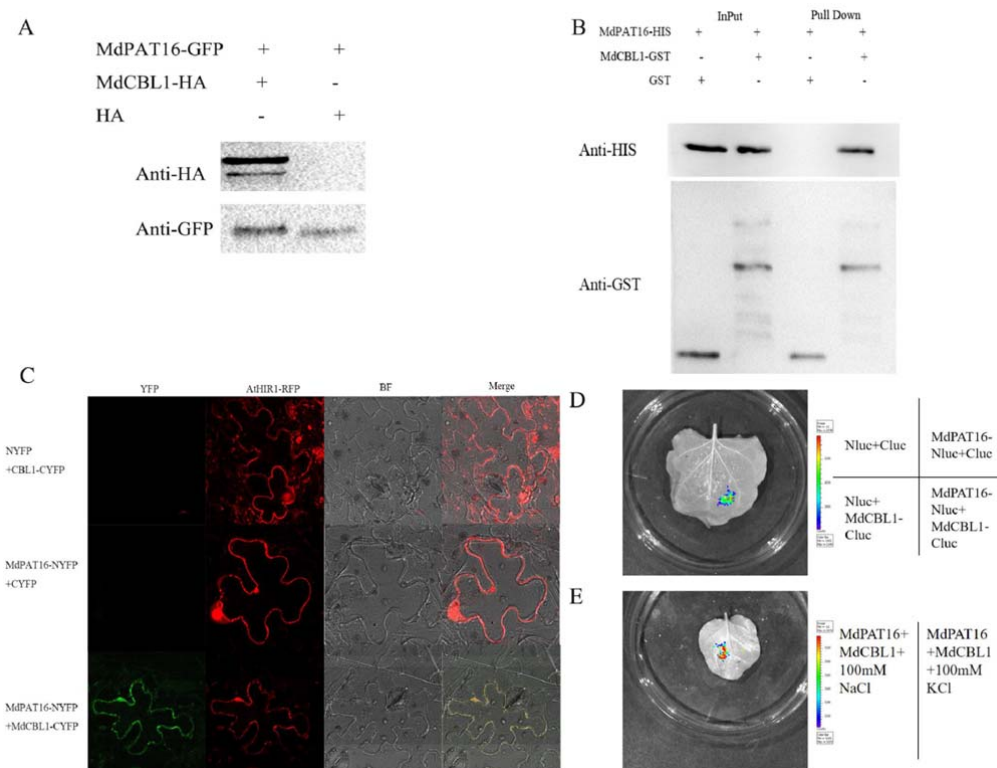

**Figure 6. MdcBCL1 is palmitoylated by MdpAT16 on the 3<sup>rd</sup> cysteine residue.** (A) *in vivo* Co-IP assays between MdPAT16/MdcBCL1-HA and MdPAT16-RNAi/MdcBCL1-HA double transgenic apple calli. The palmitoylation of MdcBCL1 was detected using anti-HA antibodies. (B) Yeast functional complementation assays using MdcBCL1<sup>C3S</sup>/akr1p and MdcBCL1<sup>C138S</sup>/akr1p demonstrated that neither point mutant of MdcBCL1 was auto-acylated. (C) ABE assays demonstrated that the 3<sup>rd</sup> but not 138<sup>th</sup> cysteine residue determined the palmitoylation of MdcBCL1.

232 MdPAT16-OVX/MdcBCL1-HA and MdPAT16-RNAi/MdcBCL1-HA double transgenic  
 233 apple calli were obtained and used for Co-IP assays with an anti-HA antibody.  
 234 MdcBCL1 palmitoylation was undetectable in MdPAT16-RNAi transgenic apple calli,  
 235 whereas MdcBCL1 was markedly palmitoylated in MdPAT16-overexpressing apple  
 236 calli (Fig. 6A), indicating that MdPAT16 is required for MdcBCL1 palmitoylation.  
 237 Furthermore, an online palmitoylation site prediction website, CSS-Palm  
 238 (<http://csspalm.biocuckoo.org/>), was used to predict the possible palmitoylation sites  
 239 of MdcBCL1. Two Cys residues, the 3<sup>rd</sup> and 138<sup>th</sup> cysteines, were scored as possible  
 240 palmitoylation sites. Functional complementation assays of the yeast *akr1p* mutant  
 241 demonstrated that MdcBCL1 protein that contained mutations at each possible  
 242 palmitoylation site failed to rescue the deficient phenotype (Fig. 6B), indicating that  
 243 the two palmitoylation sites are crucial for MdcBCL1 function.

244 Acyl-biotin exchange (ABE) assays were performed to further verify the  
245 palmitoylation sites. Western blotting indicated that MdCBL1<sup>C3S</sup>, but not  
246 MdCBL1<sup>C138S</sup>, failed to be palmitoylated by MdPAT16, indicating that the 3<sup>rd</sup> cysteine  
247 residue, but not the 138<sup>th</sup> cysteine residue, was the palmitoylation site for the  
248 MdCBL1 protein (Fig. 6C).

249 To determine whether MdPAT16-mediated palmitoylation of MdCBL1 influenced  
250 its subcellular localization, MdPAT16-GFP and MdCBL1-RFP were transiently  
251 expressed in *Nicotiana benthamiana* leaves. AtCBL1-GFP and AtHIR1-RFP  
252 fluorescent proteins were used as plasma membrane markers to co-localize with  
253 MdPAT16 and MdCBL1. Both MdPAT16 and MdCBL1 showed a significant  
254 co-localization with the plasma membrane marker (Fig. 7A). MdCBL1<sup>C3S</sup>-RFP was  
255 then used to check whether MdPAT16-mediated MdCBL1 palmitoylation influenced  
256 its subcellular localization. MdCBL1-RFP was localized to the plasma membrane in  
257 the presence of MdPAT16-GFP, whereas MdCBL1<sup>C3S</sup>-RFP was not (Fig. 7B). In  
258 addition, an uptake assay was performed to further confirm the subcellular migration  
259 of MdCBL1. Cellular compartments such as nuclei, cytoplasm, and membrane  
260 structures were isolated from tobacco leaves that transiently expressed MdCBL1-GFP  
261 and MdCBL1<sup>C3S</sup>-GFP. Western blotting assays were performed to measure the  
262 expression levels of MdCBL1-GFP and MdCBL1<sup>C3S</sup>-GFP in nuclei, cytoplasm, and  
263 membrane structures. Anti-Histone3(H3) and anti-actin were used as loading controls  
264 for nuclei and cytoplasm, respectively, while AtHIR1-RFP was co-injected as a  
265 loading control for membrane structures. The results indicated that the subcellular  
266 localization of MdCBL1 changes when palmitoylation is absent (Fig. 7C).

267 In addition, 35S::MdPAT16-OVE/MdCBL1-RFP,  
268 35S::MdPAT16-RNAi/MdCBL1-RFP, 35S::Empty Vector/MdCBL1-RFP, and  
269 35S::MdPAT16-OVE/MdCBL1<sup>C3S</sup>-RFP were genetically transformed into apple roots  
270 using an *Agrobacterium rhizogenes*-mediated transformation system. The resultant  
271 transgenic roots were used to determine whether the MdPAT16-mediated  
272 palmitoylation of MdCBL1 influences its subcellular localization. MdPAT16 was

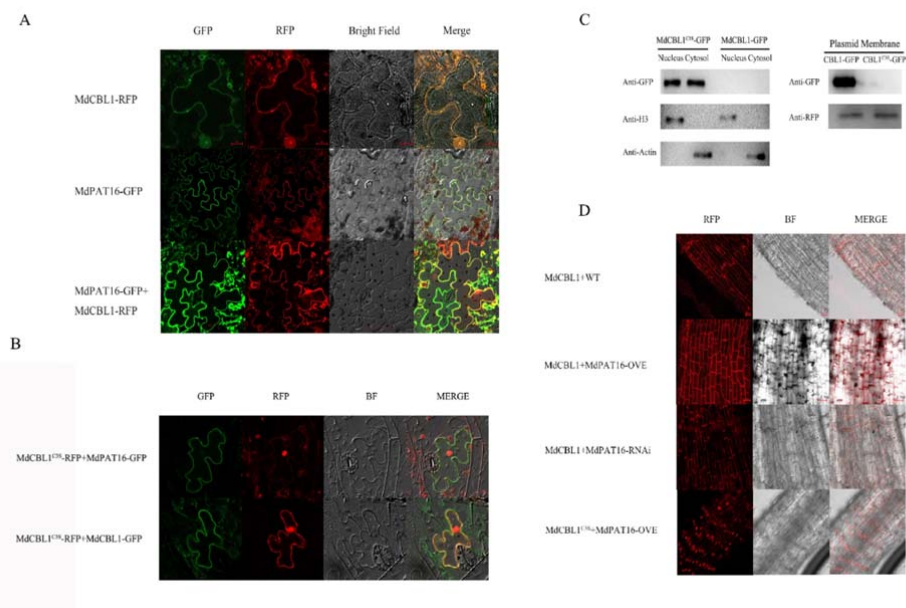

**Figure 7. Localization of MdCBL1 to the plasma membrane depends on the function of MdPAT16.** (A) Subcellular localization of MdCBL1-RFP and MdPAT16-GFP in *N. benthamiana* leaves. AtCBL1-GFP and AtHIR1-RFP were used as plasma membrane markers. (B) Subcellular localization of MdCBL1<sup>C3S</sup>-RFP. (C) Qualitative detection of MdCBL1 and MdCBL1<sup>C3S</sup> in different cellular compartments by western blotting. Anti-Histone3 and anti-actin were used as loading controls for nuclei and cytoplasm, respectively. AtHIR1-RFP was co-injected as a loading control for plasma membrane. (D) Subcellular localization of MdCBL1/WT, MdCBL1/MdPAT16-OVE, MdCBL1/MdPAT16-RNAi, and MdCBL1<sup>C3S</sup>/MdPAT16-OVE in transgenic roots of GL-3.

273 required for the plasma membrane localization of MdCBL1-RFP protein, and  
 274 MdCBL1<sup>C3S</sup>-RFP failed to localize to plasma membrane even together with MdPAT16  
 275 in 35S::MdPAT16-OVE/MdCBL1<sup>C3S</sup>-RFP transgenic apple roots (Fig. 7D). Therefore,  
 276 MdPAT16-mediated palmitoylation of MdCBL1 promotes its subcellular localization  
 277 to the plasma membrane.

278 Cell-free degradation assays were performed to examine whether  
 279 MdPAT16-mediated palmitoylation affects the protein stability of MdCBL1.  
 280 Prokaryotic-expressed MdCBL1-GST and eukaryotic-expressed MdCBL1<sup>C3S</sup>-V5  
 281 were incubated with total proteins extracted from the WT control and from  
 282 MdPAT16-GFP and MdPAT16-RNAi transgenic apple calli. MdCBL1-GST was more  
 283 stable in MdPAT16-GFP transgenic apple calli, but its stability was markedly  
 284 decreased in MdPAT16 RNAi transgenic calli. Meanwhile, MdCBL1<sup>C3S</sup>-V5 degraded  
 285 much more quickly than MdCBL1-GST. Therefore, MdPAT16-mediated

286 palmitoylation of MdCBL1 influences its stability.

287

### 288 **MdCIPK13 is required for MdPAT16-mediated sugar accumulation**

289 To determine how MdPAT16 and MdCBL1 are involved in the regulation of  
290 sugar accumulation, viral vectors were used to perform transient expression analyses  
291 in apple fruits. MdCBL1-IL60 overexpression and MdCBL1-TRV suppression vectors  
292 were constructed and injected into fruits. Like MdPAT16, MdCBL1 overexpression  
293 clearly increased sugar content, whereas its suppression decreased sugar content. As  
294 mentioned above, MdPAT16 overexpression increased sugar content (Figure 3C,D).  
295 When MdPAT16-IL60 and MdCBL1-TRV were co-injected into apple fruit, MdCBL1  
296 suppression almost completely abolished the MdPAT16-mediated increase in fruit  
297 sugar content (Fig. 9A-C). In addition, *Agrobacterium rhizogenes*-mediated genetic  
298 transformation was performed to obtain 35S::MdCBL1-OVX, 35S::MdCBL1-RNAi,  
299 and 35S::MdCBL1<sup>C3S</sup>-OVX transgenic apple roots. Increasing activity of sucrose  
300 transferase was detected in the resultant transgenic roots, respectively. MdCBL1  
301 overexpression enhanced sucrose transferase activity in transgenic apple roots, and  
302 MdCBL1 suppression inhibited it (Fig. 9D). Furthermore, mutation of the MdCBL1  
303 palmitoylation site abolished its role in enhancing sucrose transferase activity (Fig.  
304 9D), indicating that the palmitoylation site plays a crucial role in MdCBL1 function.

305 In our previous report, salt stress induced sugar accumulation in the vacuole  
306 through a MdCBL1/MdCIPK13-MdSUT2.2 pathway (Ma et al., 2019). Considering  
307 that MdCBL1 interacts with MdCIPK13, it is reasonable to propose that MdCIPK13  
308 is involved in MdPAT16-mediated sugar accumulation in response to salt stress. To  
309 verify this hypothesis, viral vectors were used to perform transient expression  
310 experiments in apple fruits. MdCIPK13-IL60 overexpression and MdCIPK13-TRV  
311 suppression vectors were constructed and used for injection. MdCIPK13-IL60  
312 promoted sugar accumulation in apple fruit, whereas MdCIPK13-TRV inhibited it  
313 (Fig. 10A). In addition, MdCIPK13 suppression abolished the MdPAT16-mediated

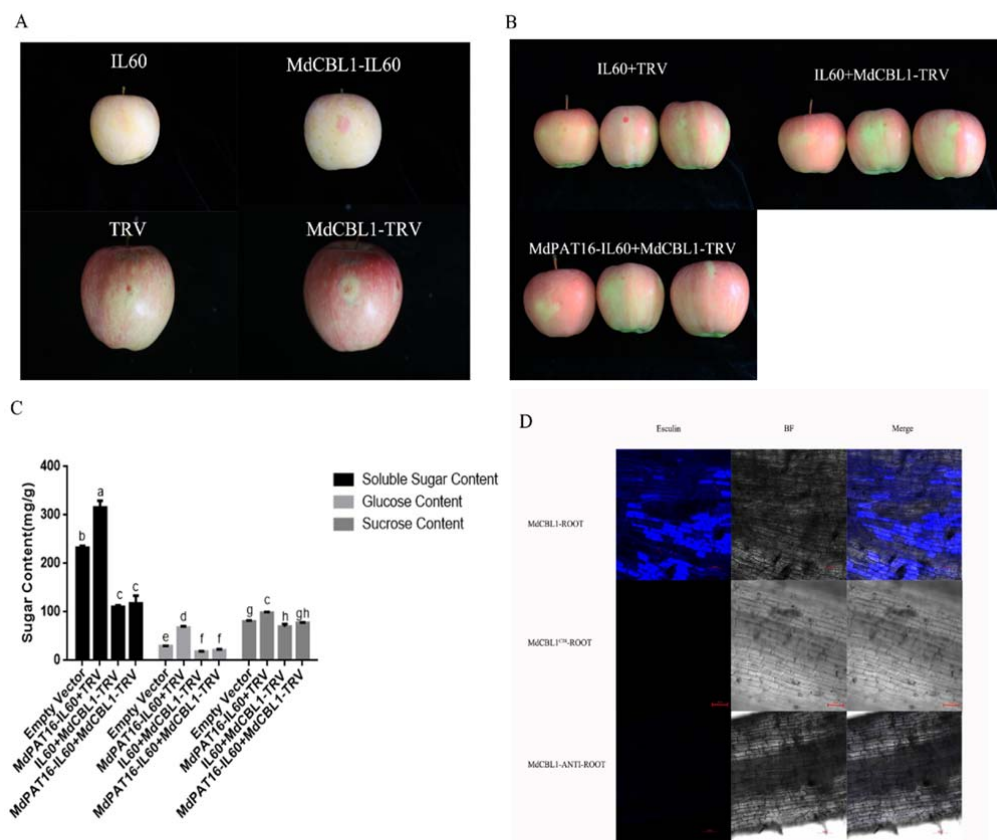

**Figure 9. MdCBL1 is required for sugar accumulation.** (A) and (B) Anthocyanin accumulation of MdCBL1-IL60, MdCBL1-TRV and Empty Vector apple fruits (A), and MdPAT16-IL60/MdCBL1-TRV, IL60/MdCBL1-TRV, and Empty Vector apple fruits (B). (C) Soluble sugar, glucose, and sucrose contents of different fruits. (D) Esculin uptake assay for sucrose transport activity in transgenic roots of MdCBL1, MdCBL1<sup>CS</sup>, and MdCBL1-RNAi.

314 sugar increase in MdPAT16-IL60+MdCIPK13-TRV co-injected apple fruits (Fig.  
 315 10A,B), indicating that MdCIPK13 is required for MdPAT16-mediated sugar  
 316 accumulation under salt stress.

317



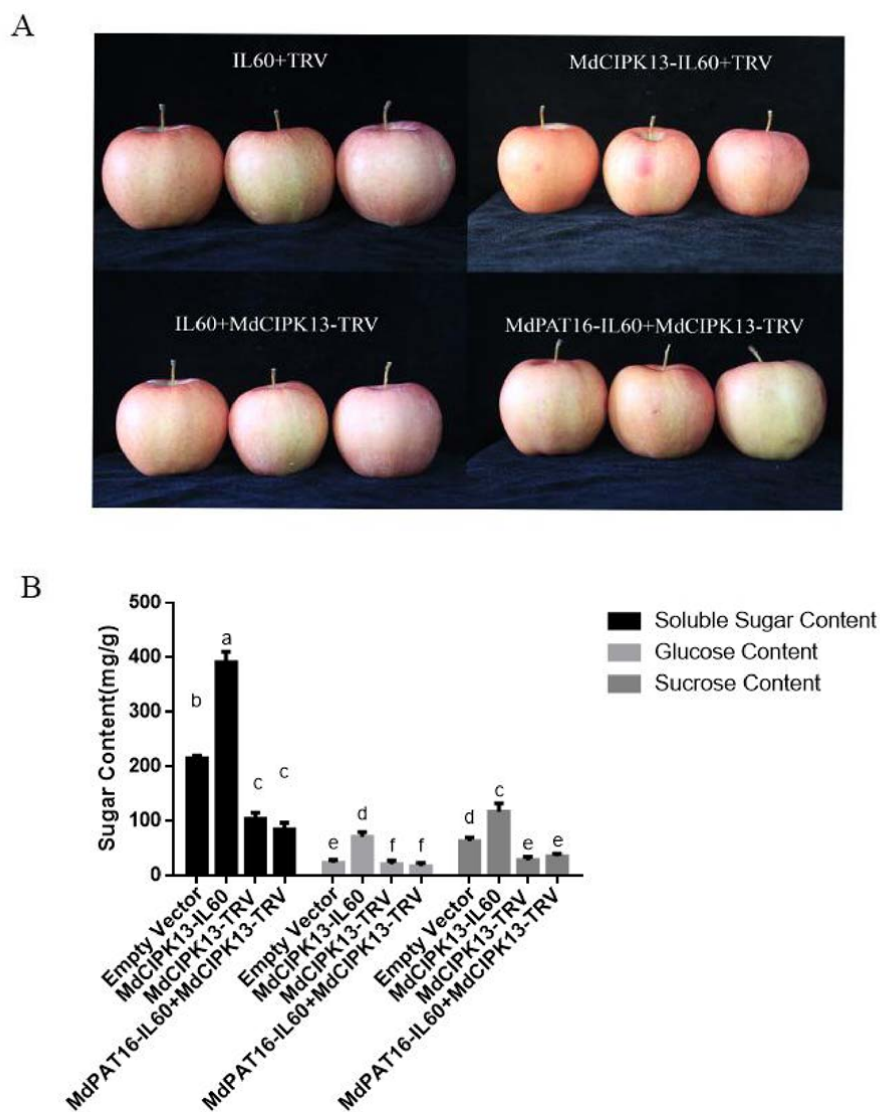

**Figure 10. MdPAT16 mediates sugar accumulation through the MdCIPK13 pathway.** Anthocyanin accumulation (A) and soluble sugar, glucose, and sucrose contents (B) of MdCIPK13-IL60, MdCIPK13-TRV, MdPAT16-IL60/ MdCIPK13-TRV, and Empty Vector apple fruits.

## 318 Discussion

319 Salt stress impedes plant growth and development via osmotic adjustment  
 320 (Munns, 2002). It also alters stomatal conductance and transpiration rate and affects  
 321 plant ion balance (Chaves et al., 2009). Soluble sugars, as compatible osmolytes, are  
 322 thought to function mainly in the stabilization of proteins and cellular structures under  
 323 stress (Sanchez et al., 2008). In addition, sugars reduce the stress-induced  
 324 accumulation of reactive oxygen species (ROS) (Hu et al., 2012), thereby increasing

325 stress resistance. Although attention has been paid to the function of sugars under salt  
326 stress, the specific mechanisms and upstream regulation of this process are still  
327 unclear. In this study, a palmitoylation transferase family member, MdPAT16, was  
328 identified in apple. In transgenic materials and VIGS fruits, MdPAT16 overexpression  
329 significantly increased soluble sugar content and root sucrose transferase activity  
330 under salt stress (Fig. 3), thereby positively modulating sugar accumulation and salt  
331 tolerance. A calcineurin B-like (CBL) protein, MdCBL1, was shown to be a substrate  
332 of MdPAT16. Further experiments demonstrated that MdPAT16 participated in the  
333 MdCBL1-MdCIPK13-MdSUT2.2 regulatory pathway through palmitoylation of  
334 MdCBL1, thereby regulating sugar accumulation (Figs. 9,10; Ma et al., 2019a).

335 PATs respond to abiotic stress. The loss-of-function mutant *pat10* exhibits  
336 hypersensitivity to salt stress in *Arabidopsis thaliana* (Cheng et al., 2005; Krebs et al.,  
337 2010; Bassil et al., 2011b; Barragán et al., 2012; Zhou et al., 2013). In maize, the  
338 S-palmitoylation family member ZmTIP1 interacts with the calcium-dependent  
339 protein kinase ZmCPK9 to regulate root hair length and drought tolerance (Zhang et  
340 al., 2019). In apple, MdPAT16 was identified as a DHHC-type PAT (Figure S5). It  
341 played roles not only in the modulation of salt tolerance (Figure 2), but also in the  
342 regulation of sugar accumulation (Figure 3).

343 The critical functions of PATs do not depend exclusively on the DHHC functional  
344 group, and not all DHHC-type PATs show palmitoyltransferase activity. Some PAT  
345 activity deficient proteins also function to the resistance to external stress, and PATs  
346 can act as cation transporters to withstand adverse circumstances (Hines et al., 2010;  
347 Ohno et al., 2012). Indeed, we could not initially exclude the possibility that the  
348 functions of MdPAT16 in salt stress resistance and sugar accumulation derived not  
349 from its palmitoylation of substrates but from its potential role as a cation transporter.  
350 However, functional complementation assays demonstrated that MdPAT16 rescued  
351 the palmitoyltransferase deficient phenotype of the *akr1p* yeast mutant, whereas  
352 MdPAT16<sup>C244A</sup> failed, indicating that MdPAT16 is a typical palmitoyltransferase.  
353 These results suggested that MdPAT16 functions through its PAT activity.

354 The functions of PATs are usually achieved through palmitoylation of substrate  
355 proteins. Palmitoylation regulates protein activity, protein sorting, and protein-protein  
356 interactions (Hemsley et al., 2013; Zhou et al., 2013). Palmitoylation also influences  
357 protein stabilization, promoting the function of substrate proteins. The human  
358 palmitoyltransferase ZDHHC14 has been shown to exert a tumor suppressor function  
359 through palmitoylation of its substrate proteins (Marc et al., 2014). A series of  
360 calmodulin proteins in plants that respond to calcium signals have been identified as  
361 PAT substrates, including CPKs (Leclercq et al., 2005; Martín and Busconi, 2000;  
362 Zhang et al., 2019), CaMs (Wang et al., 2005), and CBLs (Batistič et al., 2010; Zhou  
363 et al., 2013). Here, the CBL family protein MdCBL1 was identified as a direct  
364 substrate of MdPAT16 using mass spectrometry. MdCBL1 directly interacted with  
365 MdPAT16 *in vivo* and *in vitro*. Experiments demonstrated that the palmitoylation of  
366 MdCBL1 was dependent on MdPAT16, and MdCBL1 created a phenotype  
367 indistinguishable from that of MdPAT16 (Fig. 5). Therefore, MdCBL1 was a direct  
368 substrate of MdPAT16.

369 Substrate proteins lose membrane localization and biological function in the  
370 absence of corresponding PAT modifications. CBL2, 3, and 6 in *Arabidopsis thaliana*  
371 are substrates of PAT10, and palmitoylation site deletion mutants of CBL2, 3, and 6  
372 fail to localize to the tonoplast (Batistič, 2012; Zhou et al., 2013). The *cbl2* and *cbl3*  
373 double mutant exhibits developmental abnormalities, including leaf tip necrosis and  
374 defects in the reproductive process, that are similar to the phenotype of the *pat10*  
375 single mutant (Tang et al., 2012; Zhou et al., 2013). In apple, the membrane  
376 localization and function of MdCBL1 also depended on its palmitoylation. The  
377 palmitoylation site mutant MdCBL1<sup>C3S</sup> no longer localized to the plasma membrane,  
378 and 35S-driven MdCBL1<sup>C3S</sup> transgenic roots showed a functional absence of sucrose  
379 transferase activity without corresponding PAT modifications (Figs. 7,9D). Thus,  
380 palmitoylation modification played an important role in the function of substrate  
381 proteins. Taken together, these results suggest that the function of MdCBL1 in the  
382 regulation of sugar content is dependent on palmitoylation by MdPAT16.

383 Transgenic analyses suggested that MdCBL1<sup>C3S</sup> was mislocalized from the  
384 plasma membrane to the cytoplasm and nucleus (Fig. 7) and lost its regulatory  
385 function in sugar accumulation. Ubiquitination in plants modulates the nuclear entry  
386 and degradation of substrate proteins. Therefore, a ubiquitination enzyme may  
387 facilitate the nuclear entry and degradation of MdCBL1. Studies in humans indicate  
388 that a competitive inhibition exists between palmitoylation and ubiquitination of  
389 substrate proteins, in which palmitoylation inhibits the activity of ubiquitination  
390 enzymes (Rebecca et al., 2019). The palmitoylation modifications of PD-L1 by  
391 DHHC3 significantly inhibit the ubiquitination modifications of PD-L1 (Han et al.,  
392 2019). Therefore, MdCBL1 may be modified by ubiquitination in the absence of  
393 appropriate palmitoylation. This ubiquitination modification may be directly or  
394 indirectly affected by palmitoylation.

395 The biological functions of CBLs are performed through interaction with CIPKs  
396 (Cheong, 2003; Li et al., 2006; Pandey et al., 2004). In Arabidopsis, AtCBL1 shows a  
397 conserved interaction with AtCIPK24/SOS2 that mediates sodium ion homeostasis  
398 under salt stress (Albrecht et al., 2003). In *M. domestica*, the overexpression of  
399 MdCIPK6L causes significant improvements in salt tolerance, and the heterologous  
400 expression of MdCIPK6L rescues the salt-sensitive phenotype of *sos2* (Wang et al.,  
401 2012). MdSOS2 exhibits high similarity with AtCIPK24/SOS2, which also shows  
402 high salt tolerance (Hu et al., 2012). Apple MdSUT2.2 enhances sugar accumulation  
403 and stress resistance by the phosphorylation of MdCIPK13 (Ma et al., 2019a). Our  
404 results suggest that MdPAT16 is involved in the MdCIPK13 regulatory pathway  
405 through its interactions with MdCBL1. The palmitoylation stabilization of MdCBL1  
406 probably stabilizes the MdCBL1-MdCIPK13 protein-protein interaction and promotes  
407 the phosphorylation of MdSUT2.2, thereby causing sugar accumulation. Previous  
408 studies have also demonstrated that another *M. domestica* CIPK family member,  
409 MdCIPK22, functions similarly to MdCIPK13, interacting with MdSUT2.2 in  
410 response to drought stress to promote sugar accumulation (Ma et al., 2019b). Whether  
411 PAT is also involved in the upstream regulation of this process requires further

412 investigation.

413 MdcIPK13 and MdsUT2.2 are co-localized on the tonoplast, unlike MdcBL1  
414 and MdpAT16 that co-localize to the plasma membrane. Studies on AtCBL1  
415 demonstrate that when AtCIPK1 interacts with plasma-membrane-localized AtCBL1  
416 or tonoplast-localized AtCBL2, the subcellular localization of AtCIPK1 changes  
417 correspondently, resulting in different membrane localization (Batistič et al., 2008). A  
418 similar situation may occur for MdcIPK13, which exhibits tonoplast localization  
419 when interacting with MdsUT2.2 and plasma membrane localization when interacting  
420 with MdcBL1. Therefore, MdcIPK13 probably migrates during the interaction with  
421 different proteins, resulting in different localizations. Further experiments should be  
422 performed to assess this hypothesis.

423 Taken together, previous reports and our current study suggest a working model  
424 that summarizes our findings. Under salt stress in apple, MdpAT16 stabilizes the  
425 expression of MdcBL1 through palmitoylation and promotes sugar accumulation  
426 through the regulatory pathway of MdcBL1-MdcIPK13-MdsUT2.2 (Fig. S6).  
427 Meanwhile, there exists a ubiquitin ligase that mediates the nuclear entry and  
428 degradation of MdcBL1 in the absence of palmitoylation. This process may be  
429 directly or indirectly regulated by palmitoylation.

430 Sugar content in apple is a decisive factor for fruit quality. Sugars accumulate to  
431 maintain the intracellular ion balance in response to salt stress and also contribute to  
432 fruit quality and commodity values (Hu et al., 2016). Our work reveals a new  
433 mechanism for the regulation of sugar content and fruit quality and contributes to a  
434 better understanding the pathway by which apple responds to salt stress. Increases in  
435 carbohydrate concentration following moderate salt stress raise the question of the  
436 role of carbohydrate availability in plant growth under stress. In total, our data support  
437 the proposal that moderate upregulation of MdpAT16 has a potential role in the  
438 promotion of fruit quality during salt stress. Therefore, our research provides new  
439 ideas for the simultaneous improvement of fruit quality and stress resistance through

440 breeding methods.

441

## 442 **Materials and methods**

### 443 **Plant material, growth conditions, and salt treatments**

444 GL-3 apple (*Malus x domestica* Borkh.) tissue cultures were used for  
445 transformation and stress treatments (Chen et al., 2019). GL-3 and transgenic apple  
446 cultures were cultured and subcultured in Murashige & Skoog (MS) medium  
447 supplemented with 0.3 mg/L 6-benzylaminopurine (6-BA), 0.2 mg/L indoleacetic acid  
448 (IAA), and 0.1 mg/L gibberellin (GA). The cultures were maintained at a constant  
449 temperature of 25°C under long-day conditions (16 h light/8 h dark) and were  
450 subcultured every 30 days.

451 Seeds of *Malus hupehensis* were harvested and stratified at low temperature and  
452 humidity for more than 30 days. When the seeds began to germinate, they were  
453 transplanted into substrate under long-day greenhouse conditions (16 h light/8 h dark).  
454 Four weeks after germination, seedlings of consistent size were selected for further  
455 experiments.

456 Apple calli used in this article were induced from embryos of ‘Orin’ apples  
457 (*Malus x domestica* Borkh.). Calli were grown and subcultured on MS medium with  
458 1.5 mg/L 2,4-dichlorophenoxyacetic acid and 0.5 mg/L 6-BA at a constant  
459 temperature of 25°C in the dark and subcultured every 15 days.

460 For short-term salt treatments, 150 mM NaCl was used in hydroponic  
461 experiments. For long-term salt treatments, apple plantlets were treated with 150 mM  
462 NaCl under the greenhouse conditions described above.

463 Different concentrations of NaCl(0mM; 1mM; 10mM; and 100mM) were applied  
464 to *Malus hupehensis* apple seedlings after germination and transplanting into  
465 vermiculite. The pictures were obtained after two weeks under the same greenhouse

466 conditions described above.

467

#### 468 **Ca<sup>2+</sup>-ATPase activity, Rhizosphere pH staining, and Solution pH.**

469 The activities of Ca<sup>2+</sup>-ATPase in *Malus hupehensis* apple seedlings were detected  
470 by colorimetry method. The method was followed by Ca<sup>2+</sup>/Mg<sup>2+</sup>-ATPase activity  
471 detection kit(BC0965, Solarbio).

472 The treated roots of *Malus hupehensis* apple seedlings were placed in the  
473 solution mixed of 0.01% bromocresol violet, 0.2mm CaSO<sub>4</sub>, and 0.7% Agar (pH =  
474 6.5), and photographs were taken after 45 minutes in dark.

475 Solution pH was detected by PHS-3C pH-meter.

476

#### 477 **Genetic transformation**

478 The full-length coding sequences (CDS) of *MdPAT16* (MD10G1058600) and  
479 *MdCBL1* (MD00G1132600) were identified from the apple genome (GDDH13 v1.1)  
480 and amplified. The CDS of *MdPAT16* and *MdCBL1* were inserted into the pRI101-An  
481 plasmid with a GFP tag to build overexpression vectors. The forward and reverse  
482 fragments were also inserted into the pRNAi-E vector (Song et al., 2017) to construct  
483 RNAi vectors. Both overexpression vectors and RNAi vectors were introduced into  
484 *Agrobacterium Tumaficiens* EHA105 competent cells (Transgen). The genetic  
485 transformation procedure was performed as described in Ma et al. (2017b).

486 The full length *MdPAT16* sequence was then ligated with a GFP tag to build  
487 MdPAT16-GFP, and the full length *MdCBL1* sequence was ligated with an HA tag to  
488 build MdCBL1-HA. These vectors were introduced into ‘Orin’ apple calli using the  
489 *Agrobacterium* method as described in Ma et al. (2017a).

490 Transgenic root systems of MdPAT16 and MdCBL1 were induced by

491 *Agrobacterium Rhizogenesis* K599 competent cells (Transgen) under *Malus*  
492 *hupehensis* and GL-3 tissue culture backgrounds according to the procedure of Meng  
493 et al. (2019).

494 For Arabidopsis transformation, the MdPAT16 overexpression vector was  
495 introduced into *A. Tumaficiens* strain LBA4404. MdPAT16 was then transformed into  
496 Col-0 using the floral dip method, and the seeds were screened on 1/2 MS medium  
497 with 25 mg/L kanamycin. Positive seedlings were detected using qRT-PCR, and the  
498 screened T3 generation seedlings were used for further analysis.

499

#### 500 **RNA extraction and qRT-PCR assays**

501 Total RNA was extracted from rooted tissue cultures using the RNA Extraction  
502 Kit (Tiangen). The extracted RNA was purified using the PrimeScript First Strand  
503 cDNA Synthesis Kit (TaKaRa, Dalian, China), and the oligo DT Kit was used to  
504 generate cDNA.

505 A 20  $\mu$ l reaction system with SYBR Green Supermix (Takara) was used for  
506 qRT-PCR analysis. The total reaction system included 10  $\mu$ l SYBR Green mixture, 7  
507  $\mu$ l double distilled water, 1  $\mu$ l cDNA template, and 1  $\mu$ l each of upstream and  
508 downstream primers. Relative expression was quantified using the (Ct)  $2^{-DDCt}$  method,  
509 and *MdActin* (GenBank accession number CN938024) was selected as the internal  
510 control gene. Prism software was used to generate the chart, and the significance of  
511 treatment differences was assessed by the Data processing system software using  
512 One-way ANOVA method.

513

#### 514 **Yeast functional complementation assay**

515 The yeast palmitoylation mutant *akr1p* and its original strain, BY4741, were  
516 obtained from Thermo Scientific. The pYES2-DEST52 empty vector,



517 MdPAT16-pYES2, and MdPAT16<sup>C244A</sup>-pYES2 vectors were transformed into akr1p  
518 and BY4741. For the growth assay, yeast cells were grown to stationary phase on  
519 glucose minimal liquid media. 5 µl per yeast strain with an OD<sub>600</sub> of approximately  
520 0.5 was placed onto two individual galactose minimal agar medium plates. These  
521 plates were incubated at 28 °C and 37 °C, respectively. Cells were observed under a  
522 LSM880 laser scanning confocal microscope to obtain cell shape data, and the mutant  
523 rate was counted using ImageJ (ver. 1.41).

524

#### 525 **Acyl-Biotinyl Exchange (ABE) assay**

526 Auto-acylation of MdPAT16 was measured using an ABE assay.  
527 MdPAT16-pYES2 and MdPAT16<sup>C244A</sup>-pYES2 vectors were transformed into BY4741.  
528 Total proteins were then extracted and measured by western blotting using β-actin  
529 antibody and anti-V5 antibody. The detected proteins were selected for the ABE assay  
530 following the methods of Wan et al. (2007) .

531

#### 532 **Root shape, root length, surface area, and lateral root number**

533 The shape of roots were photographed by LA-S root scanner, and root length,  
534 surface area, and lateral root number were detected by root analyse system software  
535 by LA-S root scanner.

536

#### 537 **Glucose; Sucrose; and Soluble sugar contents detection**

538 The sugar contents were detected of same size (about 500mg) plant samples with  
539 three individual duplications. Sucrose, glucose, and soluble sugar assay kits(Keming  
540 biotechnology co. LTD) were used to detected sugar contents in samples.

541

542 **Esculin uptake**

543 The roots of transgenic root systems of MdPAT16 and MdCBL1 were rinsed and  
544 mounted on glass slides in 1/2 MS liquid media with 10 mM esculin under normal or  
545 150mM saline conditions. Fluorescence was scanned using a 367 nm excitation  
546 wavelength and a 454 nm emission wavelength as described in Ma et al. (2018).

547

548 **Virus-induced gene silencing assays**

549 Virus-induced gene silencing (VIGS) assays were performed to verify the  
550 expression patterns of MdPAT16 and MdCBL1 in apple fruit. The full length CDS of  
551 MdPAT16 and MdCBL1 were inserted into IL60-2 vectors, to construct  
552 MdPAT16-IL60-2 and MdCBL1-IL60-2, and the IL60-1 vector was used as an  
553 auxiliary plasmid. Antisense gene fragments were also used to construct  
554 MdPAT16-TRV-2 and MdCBL1-TRV-2. The TRV1 vector was used as an auxiliary  
555 plasmid. The TRV vectors were introduced into *A. Tumefaciens* strain LBA4404. The  
556 mixed vectors and *A. Tumefaciens* solutions were injected into the peels of apple fruits,  
557 and stored under 24°C with constant light. VIGS assays were performed according to  
558 the method of An et al. (2018).

559

560 **Co-IP assay**

561 Proteins were extracted from apple calli that were transformed with  
562 MdPAT16-GFP/HA and MdPAT16-GFP/MdCBL1-HA. The target proteins were  
563 absorbed by Protein A/G agarose beads (Thermo Fisher). The absorbed proteins were  
564 measured by western blotting using anti-MYC and anti-HA antibodies.

565

566 **Pull-down assay**

567 The full length of CDS of MdPAT16 and MdCBL1 were ligated to His and GST  
568 targets to build MdPAT16-His and MdCBL1-GST. The resulting plasmids were  
569 transformed into *Escherichia coli* BL21 (DE3; Transgene), and 10  $\mu$ M isopropyl  $\beta$ -D-  
570 1-thiogalactopyranoside (IPTG) was used to induce for 6 hours. Proteins were then  
571 separated and purified. The MdPAT16-His target protein was co-incubated separately  
572 with GST and MdCBL1-GST. The mixtures were eluted from glutathione-agarose  
573 beads and measured with Anti-His and Anti-GST antibodies via western blotting.

574

### 575 **Bimolecular fluorescence complementation (BiFC) assays**

576 Bimolecular fluorescence complementation (BiFC) assays were performed to  
577 verify the protein-protein interaction *in vivo*. The full-length CDS of MdPAT16 and  
578 MdCBL1 were inserted into separate fluorescence plasmids to build  
579 MdPAT16-pSPYNE and MdCBL1-pSPYCE. The two vectors and the empty vector  
580 control were transformed into tobacco (*Nicotiana benthamiana*) leaves. LSM880 laser  
581 scanning confocal microscopy (488–534 nm wavelength) was used to visualize green  
582 fluorescence, and AtCBL1, a known membrane-localized protein, was used as a  
583 plasma membrane marker.

584

### 585 **Subcellular localization**

586 MdPAT16 was ligated with a GFP target, MdCBL1 was ligated with an RFP tag,  
587 and MdCBL1<sup>C3S</sup> was ligated with an RFP tag. The resulting plasmids were  
588 transformed into *Agrobacterium* LBA4404. Membrane-localized GFP and RFP  
589 proteins were used as markers. All strains were transiently transformed into *N.*  
590 *benthamiana* leaves to observe the single localization and co-localization conditions.  
591 The proteins were extracted from leaves to perform a separation assay, and western  
592 blotting was used to verify.

593 *Agrobacterium rhizogenes*-induced transgenic roots were scanned using an

594 LSM880 laser scanning confocal microscope (488–543 nm) to measure GFP  
595 fluorescence, and FM4-64 was used as membrane-associated marker.

596

### 597 **Cell-free degradation**

598 The MdCBL1-GST protein was induced and mixed with total proteins extracted  
599 from MdPAT16-OVE and MdPAT16-RNAi transgenic apple calli, with WT apple calli  
600 proteins used as a control. The reaction mixes were incubated at 22 °C and  
601 periodically sampled. The samples were boiled and measured by western blotting  
602 using anti-Actin and anti-GST antibodies.

603

### 604 **SUPPLEMENTAL DATA**

605 **Supplementary Figure S1. Salt stress in apple promotes sugar accumulation.**

606 **Supplementary Figure S2. The MdPAT16 promoter responds to salt stress.**

607 **Supplementary Figure S3. Ectopic expression of MdPAT16 in Arabidopsis  
608 increases sugar content and salt resistance.**

609 **Supplementary Figure S4. Phylogenetic tree analysis of MdPATs and AtPATs.**

610 **Supplementary Figure S5. Sequence analysis of MdPAT16 and PAT16 in other  
611 species.**

612 **Supplementary Figure S6. Proposed model of the mechanism regulating sugar  
613 content.**

614 **Supplemental Table S1 The primers used in this study.**

615

### 616 **ACKNOWLEDGEMENTS**

617 This work was financially supported grants from National Natural Science Foundation

618 of China (U1706202), National Key Research and Development Program  
619 (2018YFD1000200), Ministry of Agriculture of China (CARS-27) and Shandong  
620 Province (SDAIT-06-03).

621

## 622 **Figure legends**

623 **Figure 1. RNAseq analysis of GL-3 tissue culture seedlings with and without**  
624 **NaCl treatment.**

625 **(A)** Gene ontology enrichment of upregulated genes in NaCl-treated and WT  
626 seedlings, presented according to  $-\log_{10}P$ -value. **(B)** Venn diagram of the genes  
627 upregulated in NaCl-treated and WT seedlings ( $\log_2\text{FoldChange} > 2$ ). **(C)** KEGG  
628 pathway classification of upregulated genes. **(D)** Normalized heatmap of sugar-related  
629 genes, including amino sugar and nucleotide sugar  
630 metabolism(MD01G1213100,MD02G1120200), starch and sucrose  
631 metabolism(MD03G1098600, MD10G1270400), sucrose transmembrane  
632 transporter(MD10G1045900), salt stress response (MD05G1119300,  
633 MD06G1147900), and MdPAT16(MD10G1058600).

634

635 **Figure 2. MdPAT16 functions as a positive regulator under salt stress. (A)** Root  
636 fluorescence identification of MdPAT16 overexpression transgenic roots (Bars = 100  
637  $\mu\text{m}$ ). **(B) and (C)** Root scan analysis of root shape, root length, surface area, and  
638 lateral root number of WT, MdPAT16-OVX, and MdPAT16-anti transgenic roots.  
639 Results are given as mean $\pm$ SD. Letters indicate significant differences ( $t$ -test,  $P < 0.01$ )  
640 **(D)** Glucose, sucrose, and soluble sugar contents of WT, MdPAT16-OVX, and  
641 MdPAT16-anti transgenic roots. **(E) and (F)** Esculin staining of sucrose transport  
642 activity in (E) WT and MdPAT16-OVX transgenic roots, and (F) MdPAT16-OVX  
643 roots treated with NaCl and KCl (Bars = 100  $\mu\text{m}$ ).

644

645 **Figure 3. Overexpression of apple MdPAT16 increases soluble sugar content. (A)**  
646 Starch staining of MdPAT16-TRV transient suppression Gala tissue culture seedlings  
647 and Empty Vector controls. **(B)** Soluble sugar, glucose, and sucrose contents of  
648 MdPAT16-TRV and Empty Vector controls. **(C) and (D)** visible anthocyanin  
649 accumulation conditions(C) and soluble sugar, glucose, and sucrose contents (D) of  
650 apple fruits from MdPAT16-IL60 (overexpression), MdPAT16-TRV (suppression) and  
651 Empty Vector controls.

652

653 **Figure 4. MdPAT16 is an S-palmitoyltransferase. (A)** Growth test (above) and  
654 survival test (below). Under the nonpermissive temperature of 37°C (right), wild-type  
655 (BY4741) yeast cells grew well, but *akr1p* did not. Expression of MdPAT16 in *akr1p*  
656 largely restored growth, but MdPAT16<sup>C244A</sup> failed. **(B) and (C)** Observations of cell  
657 shape using a LSM880 high resolution laser confocal microscope (B). The cell shape  
658 of MdPAT16/*akr1p* was indistinguishable from WT, whereas that of MdPAT16<sup>C244A</sup>  
659 differed. Quantitative statistics of all four genotypes grown at 37°C (C). **(D)**  
660 MdPAT16-V5/*akr1p* and pYES2-V5/*akr1p* by ABE assay were measured by Western  
661 blotting with anti-V5 antibody to demonstrate that apple MdPAT16 is auto-acylated.

662

663 **Figure 5. MdCBL1 is a direct substrate of MdPAT16. (A)** in vivo Co-IP assays  
664 between MdPAT16 and MdCBL1 by western blotting with anti-HA and anti-GFP  
665 antibodies. **(B)** in vitro GST pull-down assays with MdPAT16-HIS and  
666 MdCBL1-GST. Proteins immunoprecipitated with GST-beads were detected using  
667 anti-HIS antibody. **(C)** BiFC was performed to test the interaction between MdPAT16  
668 and MdCBL1, and AtHIR1-RFP was co-injected as a plasma membrane marker. Bars  
669 = 10 μm. **(D) and (E)** The interaction between MdPAT16 and MdCBL1 was  
670 visualized with a dual-luciferase reporter system (D) and fluorescence activity was  
671 observed with and without NaCl (E).

672

673 **Figure 6. MdCBL1 is palmitoylated by MdPAT16 on the 3rd cysteine residue. (A)**  
674 in vivo Co-IP assays between MdPAT16/MdCBL1-HA and  
675 MdPAT16-RNAi/MdCBL1-HA double transgenic apple calli. The palmitoylation of  
676 MdCBL1 was detected using anti-HA antibodies. **(B)** Yeast functional  
677 complementation assays using MdCBL1<sup>C3S</sup>/akr1p and MdCBL1<sup>C138S</sup>/akr1p  
678 demonstrated that neither point mutant of MdCBL1 was auto-acylated. **(C)** ABE  
679 assays demonstrated that the 3rd but not 138th cysteine residue determined the  
680 palmitoylation of MdCBL1.

681

682 **Figure 7. Localization of MdCBL1 to the plasma membrane depends on the**  
683 **function of MdPAT16. (A)** Subcellular localization of MdCBL1-RFP and  
684 MdPAT16-GFP in *N. benthamiana* leaves. AtCBL1-GFP and AtHIR1-RFP were used  
685 as plasma membrane markers. **(B)** Subcellular localization of MdCBL1<sup>C3S</sup>-RFP. **(C)**  
686 Qualitative detection of MdCBL1 and MdCBL1<sup>C3S</sup> in different cellular compartments  
687 by western blotting. Anti-Histone3 and anti-actin were used as loading controls for  
688 nuclei and cytoplasm, respectively. AtHIR1-RFP was co-injected as a loading control  
689 for plasma membrane. **(D)** Subcellular localization of MdCBL1/WT,  
690 MdCBL1/MdPAT16-OVE, MdCBL1/MdPAT16-RNAi, and MdCBL1<sup>C3S</sup>/  
691 MdPAT16-OVE in transgenic roots of GL-3.

692

693 **Figure 8. MdPAT16 stabilizes MdCBL1 through palmitoylation. (A), (B) and (C)**  
694 Cell-free degradation assay in which MdCBL1-GST was recombined with total  
695 proteins extracted from WT (A), MdPAT16-OVE (B), and MdPAT16-RNAi (C) apple  
696 calli under a water bath for 1, 2, and 3 h. The expression of MdCBL1 was measured  
697 by western blotting. **(D)** Cell-free degradation assay in which MdCBL1<sup>C3S</sup>-V5 was  
698 recombined with total proteins extracted from MdPAT16-OVE apple calli under a

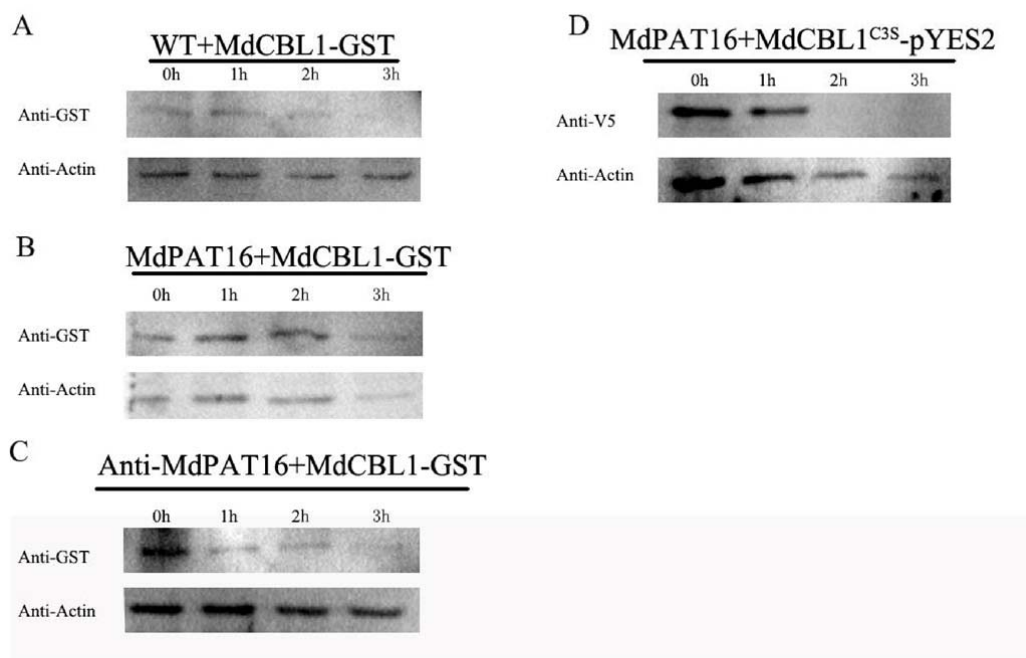

**Figure 8. MdPAT16 stabilizes MdCBL1 through palmitoylation.** (A), (B) and (C) Cell-free degradation assay in which MdCBL1-GST was recombined with total proteins extracted from WT (A), MdPAT16-OVE (B), and MdPAT16-RNAi (C) apple calli under a water bath for 1, 2, and 3 h. The expression of MdCBL1 was measured by western blotting. (D) Cell-free degradation assay in which MdCBL1<sup>C3S</sup>-V5 was recombined with total proteins extracted from MdPAT16-OVE apple calli under a water bath for 1, 2, and 3 h.

699 water bath for 1, 2, and 3 h.

700

701 **Figure 9. MdCBL1 is required for sugar accumulation.** (A) and (B) Anthocyanin  
702 accumulation of MdCBL1-IL60, MdCBL1-TRV and Empty Vector apple fruits (A),  
703 and MdPAT16-IL60/MdCBL1-TRV, IL60/MdCBL1-TRV, and Empty Vector apple  
704 fruits (B). (C) Soluble sugar, glucose, and sucrose contents of different fruits. (D)  
705 Esculin uptake assay for sucrose transport activity in transgenic roots of MdCBL1,  
706 MdCBL1<sup>C3S</sup>, and MdCBL1-RNAi.

707

708 **Figure 10. MdPAT16 mediates sugar accumulation through the MdCIPK13**  
709 **pathway.** Anthocyanin accumulation (A) and soluble sugar, glucose, and sucrose  
710 contents (B) of MdCIPK13-IL60, MdCIPK13-TRV, MdPAT16-IL60/  
711 MdCIPK13-TRV, and Empty Vector apple fruits.



712

713

## Parsed Citations

**Albrecht, V., Weinl, S., Blazevic, D., Dangelo, C., Batistic, O., Kolukisaoglu, U., ... & Kudla, J. (2003).** The calcium sensor CBL1 integrates plant responses to abiotic stresses. *Plant Journal*, 36(4), 457-470.

Pubmed: [Author and Title](#)

Google Scholar: [Author Only Title Only Author and Title](#)

**An, J., Yao, J., Xu, R., You, C., Wang, X., & Hao, Y. (2018).** Apple bZIP transcription factor MdbZIP44 regulates abscisic acid-promoted anthocyanin accumulation. *Plant Cell and Environment*, 41(11), 2678-2692.

Pubmed: [Author and Title](#)

Google Scholar: [Author Only Title Only Author and Title](#)

**Batistic, O., & Kudla, J. (2009).** Plant calcineurin B-like proteins and their interacting protein kinases.. *Biochimica et Biophysica Acta*, 1793(6), 985-992.

Pubmed: [Author and Title](#)

Google Scholar: [Author Only Title Only Author and Title](#)

**Batistic, O., Rehers, M., Akerman, A., Schlucking, K., Steinhorst, L., Yalovsky, S., & Kudla, J. (2012).** S-acylation-dependent association of the calcium sensor CBL2 with the vacuolar membrane is essential for proper abscisic acid responses.. *Cell Research*, 22(7), 1155-1168.

Pubmed: [Author and Title](#)

Google Scholar: [Author Only Title Only Author and Title](#)

**Batistic, O., Sorek, N., Schultke, S., Yalovsky, S., & Kudla, J. (2008).** Dual Fatty Acyl Modification Determines the Localization and Plasma Membrane Targeting of CBL/CIPK Ca<sup>2+</sup> Signaling Complexes in Arabidopsis. *The Plant Cell*, 20(5), 1346-1362.

Pubmed: [Author and Title](#)

Google Scholar: [Author Only Title Only Author and Title](#)

**Batistic, O., Waadt, R., Steinhorst, L., Held, K., & Kudla, J. (2009).** CBL-mediated targeting of CIPKs facilitates the decoding of calcium signals emanating from distinct cellular stores.. *Plant Journal*, 61(2), 211-222.

Pubmed: [Author and Title](#)

Google Scholar: [Author Only Title Only Author and Title](#)

**Batistic, O. (2012).** Genomics and Localization of the Arabidopsis DHHC-Cysteine-Rich Domain S -Acyltransferase Protein Family. *Plant Physiology*, 160(3), 1597-1612.

Pubmed: [Author and Title](#)

Google Scholar: [Author Only Title Only Author and Title](#)

**Bizzozero, O. A., McGarry, J. F., & Lees, M. B. (1987).** Autoacylation of myelin proteolipid protein with acyl coenzyme A. *Journal of Biological Chemistry*, 262(28), 13550-13557.

Pubmed: [Author and Title](#)

Google Scholar: [Author Only Title Only Author and Title](#)

**Chaves, M. M., Flexas, J., & Pinheiro, C. (2009).** Photosynthesis under drought and salt stress: regulation mechanisms from whole plant to cell.. *Annals of Botany*, 103(4), 551-560.

Pubmed: [Author and Title](#)

Google Scholar: [Author Only Title Only Author and Title](#)

**Chen, K., Song, M., Guo, Y., Liu, L., Xue, H., Dai, H., & Zhang, Z (2019).** MdMYB46 could enhance salt and osmotic stress tolerance in apple by directly activating stress-responsive signals. *Plant Biotechnology Journal*, 17(12), 2341-2355.

Pubmed: [Author and Title](#)

Google Scholar: [Author Only Title Only Author and Title](#)

**Chen, S., Zhu, B., Yin, C., Liu, W., Han, C., Chen, B., ... & Cui, R. (2017).** Palmitoylation-dependent activation of MC1R prevents melanomagenesis. *Nature*, 549(7672), 399-403.

Pubmed: [Author and Title](#)

Google Scholar: [Author Only Title Only Author and Title](#)

**Duncan, J. A., & Gilman, A. G. (1996).** Autoacylation of G Protein  $\alpha$  Subunits. *Journal of Biological Chemistry*, 271(38), 23594-23600.

Pubmed: [Author and Title](#)

Google Scholar: [Author Only Title Only Author and Title](#)

**Feng, Y., & Davis, N. G. (2000).** Akr1p and the type I casein kinases act prior to the ubiquitination step of yeast endocytosis: Akr1p is required for kinase localization to the plasma membrane. *Molecular and Cellular Biology*, 20(14), 5350-5359.

Pubmed: [Author and Title](#)

Google Scholar: [Author Only Title Only Author and Title](#)

**Frey, N. F., Mbengue, M., Kwaaitaal, M., Nitsch, L., Altenbach, D., Haweker, H., ... & Robatzek, S. (2012).** Plasma Membrane Calcium ATPases Are Important Components of Receptor-Mediated Signaling in Plant Immune Responses and Development. *Plant Physiology*, 159(2), 798-809.

Pubmed: [Author and Title](#)

Google Scholar: [Author Only Title Only Author and Title](#)

**Gibson S. I. (2005).** Control of plant development and gene expression by sugar signaling. *Current opinion in plant biology*, 8(1), 93–

102.

Pubmed: [Author and Title](#)

Google Scholar: [Author Only Title Only Author and Title](#)

**Gonzalezsiso, M. I., Garcialeiro, A., Tarrío, N., & Cerdan, M. E. (2009). Sugar metabolism, redox balance and oxidative stress response in the respiratory yeast *Kluyveromyces lactis*. *Microbial Cell Factories*, 8(1), 46-46.**

Pubmed: [Author and Title](#)

Google Scholar: [Author Only Title Only Author and Title](#)

**Hemsley, P. A., Kemp, A., & Grierson, C. S. (2005). The TIP GROWTH DEFECTIVE1 S -Acyl Transferase Regulates Plant Cell Growth in *Arabidopsis*. *The Plant Cell*, 17(9), 2554-2563.**

Pubmed: [Author and Title](#)

Google Scholar: [Author Only Title Only Author and Title](#)

**Hemsley, P. A., Weimar, T., Lilley, K. S., Dupree, P., & Grierson, C. S. (2013). A proteomic approach identifies many novel palmitoylated proteins in *Arabidopsis*. *New Phytologist*, 197(3), 805-814.**

Pubmed: [Author and Title](#)

Google Scholar: [Author Only Title Only Author and Title](#)

**Hines, R. M., Kang, R., Goytain, A., & Quamme, G. A. (2010). Golgi-specific DHHC Zinc Finger Protein GODZ Mediates Membrane Ca<sup>2+</sup> Transport. *Journal of Biological Chemistry*, 285(7), 4621-4628.**

Pubmed: [Author and Title](#)

Google Scholar: [Author Only Title Only Author and Title](#)

**Hou, H., Subramanian, K., Lagrassa, T. J., Markgraf, D., Dietrich, L. E., Urban, J., ... & Ungermann, C. (2005). The DHHC protein Pfa3 affects vacuole-associated palmitoylation of the fusion factor Vac8. *Proceedings of the National Academy of Sciences of the United States of America*, 102(48), 17366-17371.**

Pubmed: [Author and Title](#)

Google Scholar: [Author Only Title Only Author and Title](#)

**Hu, D., Li, M., Luo, H., Dong, Q., Yao, Y., You, C., & Hao, Y. (2012). Molecular cloning and functional characterization of MdSOS2 reveals its involvement in salt tolerance in apple callus and *Arabidopsis*. *Plant Cell Reports*, 31(4), 713-722.**

Pubmed: [Author and Title](#)

Google Scholar: [Author Only Title Only Author and Title](#)

**Hu, D., Sun, C., Sun, M., & Hao, Y. (2016). MdSOS2L1 phosphorylates MdVHA-B1 to modulate malate accumulation in response to salinity in apple. *Plant Cell Reports*, 35(3), 705-718.**

Pubmed: [Author and Title](#)

Google Scholar: [Author Only Title Only Author and Title](#)

**Hu, M., Shi, Z., Zhang, Z., Zhang, Y., & Li, H. (2012). Effects of exogenous glucose on seed germination and antioxidant capacity in wheat seedlings under salt stress. *Plant Growth Regulation*, 68(2), 177-188.**

Pubmed: [Author and Title](#)

Google Scholar: [Author Only Title Only Author and Title](#)

**Jang, I., Henriques, R., Seo, H. S., Nagatani, A., & Chua, N. (2010). *Arabidopsis* PHYTOCHROME INTERACTING FACTOR Proteins Promote Phytochrome B Polyubiquitination by COP1 E3 Ligase in the Nucleus. *The Plant Cell*, 22(7), 2370-2383.**

Pubmed: [Author and Title](#)

Google Scholar: [Author Only Title Only Author and Title](#)

**Jonassen, E. M., Lea, U. S., & Lillo, C. (2008). HY5 and HYH are positive regulators of nitrate reductase in seedlings and rosette stage plants. *Planta*, 227(3), 559-564.**

Pubmed: [Author and Title](#)

Google Scholar: [Author Only Title Only Author and Title](#)

**Kerepesi, I., & Galiba, G. (2000). Osmotic and salt stress-induced alteration in soluble carbohydrate content in wheat seedlings. *Crop Science*, 40(2), 482-487.**

Pubmed: [Author and Title](#)

Google Scholar: [Author Only Title Only Author and Title](#)

**Krasensky, J., & Jonak, C. (2012). Drought, salt, and temperature stress-induced metabolic rearrangements and regulatory networks. *Journal of Experimental Botany*, 63(4), 1593-1608.**

Pubmed: [Author and Title](#)

Google Scholar: [Author Only Title Only Author and Title](#)

**Lagrassa, T. J., & Ungermann, C. (2005). The vacuolar kinase Yck3 maintains organelle fragmentation by regulating the HOPS tethering complex. *Journal of Cell Biology*, 168(3), 401-414.**

Pubmed: [Author and Title](#)

Google Scholar: [Author Only Title Only Author and Title](#)

**Leclercq, J., Ranty, B., Sanchezballesta, M. T., Li, Z., Jones, B., Jauneau, A., ... & Bouzayen, M. (2004). Molecular and biochemical characterization of LeCRK1, a ripening-associated tomato CDPK-related kinase. *Journal of Experimental Botany*, 56(409), 25-35.**

Pubmed: [Author and Title](#)

Google Scholar: [Author Only Title Only Author and Title](#)

Liu, X., Dong, Y., Liu, X., You, C., & Hao, Y. (2019). A C2-domain phospholipid-binding protein MdCAIP1 positively regulates salt and osmotic stress tolerance in apple. *Plant Cell Tissue and Organ Culture*, 138(1), 29-39.

Pubmed: [Author and Title](#)

Google Scholar: [Author Only Title Only Author and Title](#)

Pei, L., Wang, J., Li, K., Li, Y., Li, B., Gao, F., & Yang, A. (2012). Overexpression of *Theellungiella halophila* H<sup>+</sup>-pyrophosphatase gene improves low phosphate tolerance in maize. *PLoS one*, 7(8), e43501.

Pubmed: [Author and Title](#)

Google Scholar: [Author Only Title Only Author and Title](#)

Ma, Q., Sun, M., Kang, H., Lu, J., You, C., & Hao, Y. (2019). A CIPK protein kinase targets sucrose transporter MdSUT2.2 at Ser254 for phosphorylation to enhance salt tolerance. *Plant Cell and Environment*, 42(3), 918-930.

Pubmed: [Author and Title](#)

Google Scholar: [Author Only Title Only Author and Title](#)

Ma, Q., Sun, M., Lu, J., Liu, Y., You, C., & Hao, Y. (2017). An apple CIPK protein kinase targets a novel residue of AREB transcription factor for ABA-dependent phosphorylation. *Plant Cell and Environment*, 40(10), 2207-2219.

Pubmed: [Author and Title](#)

Google Scholar: [Author Only Title Only Author and Title](#)

Ma, Q., Sun, M., Lu, J., Kang, H., You, C., & Hao, Y. (2019). An apple sucrose transporter MdSUT2.2 is a phosphorylation target for protein kinase MdCIPK22 in response to drought. *Plant Biotechnology Journal*, 17(3), 625-637.

Pubmed: [Author and Title](#)

Google Scholar: [Author Only Title Only Author and Title](#)

Ma, Q., Sun, M., Lu, J., Liu, Y., You, C., & Hao, Y. (2017). An apple CIPK protein kinase targets a novel residue of AREB transcription factor for ABA-dependent phosphorylation. *Plant Cell and Environment*, 40(10), 2207-2219.

Pubmed: [Author and Title](#)

Google Scholar: [Author Only Title Only Author and Title](#)

Martin, M. L., & Busconi, L. (2000). Membrane localization of a rice calcium-dependent protein kinase (CDPK) is mediated by myristoylation and palmitoylation. *Plant Journal*, 24(4), 429-435.

Pubmed: [Author and Title](#)

Google Scholar: [Author Only Title Only Author and Title](#)

Morsomme, P., & Boutry, M. (2000). The plant plasma membrane H<sup>+</sup>-ATPase: structure, function and regulation. *Biochimica et Biophysica Acta*, 1465(1-2), 1-16.

Pubmed: [Author and Title](#)

Google Scholar: [Author Only Title Only Author and Title](#)

Moustakas, M., Sperdoui, I., Kouna, T., Antonopoulou, C., & Therios, I. (2011). Exogenous proline induces soluble sugar accumulation and alleviates drought stress effects on photosystem II functioning of *Arabidopsis thaliana* leaves. *Plant Growth Regulation*, 65(2), 315-325.

Pubmed: [Author and Title](#)

Google Scholar: [Author Only Title Only Author and Title](#)

Munns, R., & Tester, M. (2008). Mechanisms of salinity tolerance. *Annual Review of Plant Biology*, 59(1), 651-681.

Pubmed: [Author and Title](#)

Google Scholar: [Author Only Title Only Author and Title](#)

Munns, R. (2002). Comparative physiology of salt and water stress. *Plant Cell and Environment*, 25(2), 239-250.

Pubmed: [Author and Title](#)

Google Scholar: [Author Only Title Only Author and Title](#)

Ohno, Y., Kashio, A., Ogata, R., Ishitomi, A., Yamazaki, Y., & Kihara, A. (2012). Analysis of substrate specificity of human DHHC protein acyltransferases using a yeast expression system. *Molecular Biology of the Cell*, 23(23), 4543-4551.

Pubmed: [Author and Title](#)

Google Scholar: [Author Only Title Only Author and Title](#)

Ohno, Y., Kihara, A., Sano, T., & Igarashi, Y. (2006). Intracellular localization and tissue-specific distribution of human and yeast DHHC cysteine-rich domain-containing proteins. *Biochimica et Biophysica Acta*, 1761(4), 474-483.

Pubmed: [Author and Title](#)

Google Scholar: [Author Only Title Only Author and Title](#)

Ohto, M., Onai, K., Furukawa, Y., Aoki, E., Araki, T., & Nakamura, K. (2001). Effects of Sugar on Vegetative Development and Floral Transition in *Arabidopsis*. *Plant Physiology*, 127(1), 252-261.

Pubmed: [Author and Title](#)

Google Scholar: [Author Only Title Only Author and Title](#)

Parida, A., & Das, A. B. (2005). Salt tolerance and salinity effects on plants: a review. *Ecotoxicology and Environmental Safety*, 60(3), 324-349.

Pubmed: [Author and Title](#)

Google Scholar: [Author Only Title Only Author and Title](#)

Qi, B., Doughty, J., & Hooley, R. (2013). A Golgi and tonoplast localized S-acyl transferase is involved in cell expansion, cell division,

**vascular patterning and fertility in Arabidopsis..** *New Phytologist*, 200(2), 444-456.

Pubmed: [Author and Title](#)

Google Scholar: [Author Only Title Only Author and Title](#)

**Qi, B., Li, Y., Doughty, J., & Scott, R. (2014).** Further characterization of protein S-acyl transferase 10 in Arabidopsis. In *Proceedings of the Society of Experimental Biology, 2014, Manchester*

Pubmed: [Author and Title](#)

Google Scholar: [Author Only Title Only Author and Title](#)

**Rasheed, R., Wahid, A., Farooq, M., Hussain, I., & Basra, S. M. (2011).** Role of proline and glycinebetaine pretreatments in improving heat tolerance of sprouting sugarcane (*Saccharum sp.*) buds. *Plant Growth Regulation*, 65(1), 35-45.

Pubmed: [Author and Title](#)

Google Scholar: [Author Only Title Only Author and Title](#)

**Rebecca, V. W., Nicastrì, M. C., Fennelly, C., Chude, C. I., Barberrotenberg, J. S., Ronghe, A., ... & Amaravadi, R. K. (2019).** PPT1 Promotes Tumor Growth and Is the Molecular Target of Chloroquine Derivatives in Cancer.. *Cancer Discovery*, 9(2), 220-229.

Pubmed: [Author and Title](#)

Google Scholar: [Author Only Title Only Author and Title](#)

**Sanchez, D. H., Siahpoosh, M. R., Roessner, U., Udvardi, M. K., & Kopka, J. (2007).** Plant metabolomics reveals conserved and divergent metabolic responses to salinity. *Physiologia Plantarum*, 132(2), 209-219.

Pubmed: [Author and Title](#)

Google Scholar: [Author Only Title Only Author and Title](#)

**Shi, H., Ishitani, M., Kim, C., & Zhu, J. K. (2000).** The Arabidopsis thaliana salt tolerance gene SOS1 encodes a putative Na<sup>+</sup>/H<sup>+</sup> antiporter. *Proceedings of the National Academy of Sciences of the United States of America*, 97(12), 6896-6901.

Pubmed: [Author and Title](#)

Google Scholar: [Author Only Title Only Author and Title](#)

**Sorek, N., Poraty, L., Sternberg, H., Bar, E., Lewinsohn, E., & Yalovsky, S. (2007).** Activation Status-Coupled Transient S Acylation Determines Membrane Partitioning of a Plant Rho-Related GTPase. *Molecular and Cellular Biology*, 27(6), 2144-2154.

Pubmed: [Author and Title](#)

Google Scholar: [Author Only Title Only Author and Title](#)

**Subramanian, K., Dietrich, L. E., Hou, H., Lagrassa, T. J., Meiringer, C. T., & Ungermann, C. (2006).** Palmitoylation determines the function of Vac8 at the yeast vacuole. *Journal of Cell Science*, 119(12), 2477-2485.

Pubmed: [Author and Title](#)

Google Scholar: [Author Only Title Only Author and Title](#)

**Sultana, N., Ikeda, T., & Itoh, R. (1999).** EFFECT OF NA CL SALINITY ON PHOTOSYNTHESIS AND DRY MATTER ACCUMULATION IN DEVELOPING RICE GRAINS. *Environmental and Experimental Botany*, 42(3), 211-220.

Pubmed: [Author and Title](#)

Google Scholar: [Author Only Title Only Author and Title](#)

**Sun, B., Chen, L., Cao, W., Roth, A F., Davis, N. G. (2004)** The yeast casein kinase Yck3p is palmitoylated, then sorted to the vacuolar membrane with AP-3-dependent recognition of a YXXPhi adaptin sorting signal. *Mol Biol Cell* 15: 1397-1406

Pubmed: [Author and Title](#)

Google Scholar: [Author Only Title Only Author and Title](#)

**Sun, M. H., Ma, Q. J., Hu, D. G., Zhu, X. P., You, C. X., Shu, H. R., & Hao, Y. J. (2018).** The Glucose Sensor MdHXK1 Phosphorylates a Tonoplast Na<sup>+</sup>/H<sup>+</sup> Exchanger to Improve Salt Tolerance. *Plant physiology*, 176(4), 2977-2990.

Pubmed: [Author and Title](#)

Google Scholar: [Author Only Title Only Author and Title](#)

**Tang, R. J., Liu, H., Yang, Y., Yang, L., Gao, X. S., Garcia, V. J., Luan, S., & Zhang, H. X. (2012).** Tonoplast calcium sensors CBL2 and CBL3 control plant growth and ion homeostasis through regulating V-ATPase activity in Arabidopsis. *Cell research*, 22(12), 1650-1665.

Pubmed: [Author and Title](#)

Google Scholar: [Author Only Title Only Author and Title](#)

**Uemura, T., Sato, M. H., & Takeyasu, K. (2005).** The longin domain regulates subcellular targeting of VAMP7 in Arabidopsis thaliana. *FEBS Letters*, 579(13), 2842-2846.

Pubmed: [Author and Title](#)

Google Scholar: [Author Only Title Only Author and Title](#)

**Ullah, H., Chen, J., Wang, S., & Jones, A M. (2002).** Role of a heterotrimeric G protein in regulation of Arabidopsis seed germination. *Plant Physiology*, 129(2), 897-907.

Pubmed: [Author and Title](#)

Google Scholar: [Author Only Title Only Author and Title](#)

**Ullah, H., Chen, J., Young, J. C., Im, K., Sussman, M. R., & Jones, A M. (2001).** Modulation of Cell Proliferation by Heterotrimeric G Protein in Arabidopsis. *Science*, 292(5524), 2066-2069.

Pubmed: [Author and Title](#)

Google Scholar: [Author Only Title Only Author and Title](#)

**Valdeztaubas, J., & Pelham, H. R. (2005).** Swf1-dependent palmitoylation of the SNARE Tlg1 prevents its ubiquitination and

**degradation. The EMBO Journal, 24(14), 2524-2532.**

Pubmed: [Author and Title](#)

Google Scholar: [Author Only Title Only Author and Title](#)

**Walsh, G., & Jefferis, R. (2006). Post-translational modifications in the context of therapeutic proteins. Nature Biotechnology, 24(10), 1241-1252.**

Pubmed: [Author and Title](#)

Google Scholar: [Author Only Title Only Author and Title](#)

**Wan, J., Roth, A. F., Bailey, A. O., & Davis, N. G. (2007). Palmitoylated proteins: purification and identification. Nature Protocols, 2(7), 1573-1584.**

Pubmed: [Author and Title](#)

Google Scholar: [Author Only Title Only Author and Title](#)

**Wang, X., Tian, Q., Okano, A., Sakagami, H., Moon, I. S., Kondo, H., ... & Suzuki, T. (2005). BAALC 1-6-8 protein is targeted to postsynaptic lipid rafts by its N-terminal myristoylation and palmitoylation, and interacts with  $\alpha$ , but not  $\beta$ , subunit of Ca<sup>2+</sup>/calmodulin-dependent protein kinase II. Journal of Neurochemistry, 92(3), 647-659.**

Pubmed: [Author and Title](#)

Google Scholar: [Author Only Title Only Author and Title](#)

**Wang, H., Tse, Y. C., Law, A. H., Sun, S. S., Sun, Y., Xu, Z., ... & Jiang, L. (2010). Vacuolar sorting receptors (VSRs) and secretory carrier membrane proteins (SCAMPs) are essential for pollen tube growth. Plant Journal, 61(5), 826-838.**

Pubmed: [Author and Title](#)

Google Scholar: [Author Only Title Only Author and Title](#)

**Wang, Y., Catlett, N. L., & Weisman, L. S. (1998). Vac8p, a Vacuolar Protein with Armadillo Repeats, Functions in both Vacuole Inheritance and Protein Targeting from the Cytoplasm to Vacuole. Journal of Cell Biology, 140(5), 1063-1074.**

Pubmed: [Author and Title](#)

Google Scholar: [Author Only Title Only Author and Title](#)

**Wedegaertner, P. B., Chu, D. H., Wilson, P. T., Levis, M. J., & Bourne, H. R. (1993). Palmitoylation is required for signaling functions and membrane attachment of Gq alpha and Gs alpha. Journal of Biological Chemistry, 268(33), 25001-25008.**

Pubmed: [Author and Title](#)

Google Scholar: [Author Only Title Only Author and Title](#)

**Wolff, J., Zambito, A. M., Britto, P. J., & Knipping, L. (2000). Autopalmitoylation of tubulin. Protein Science, 9(7), 1357-1364.**

Pubmed: [Author and Title](#)

Google Scholar: [Author Only Title Only Author and Title](#)

**Wu, F. H., Shen, S. C., Lee, L., Lee, S., Chan, M. T., & Lin, C. (2009). Tape-Arabidopsis Sandwich - a simpler Arabidopsis protoplast isolation method. Plant Methods, 5(1), 16-16.**

Pubmed: [Author and Title](#)

Google Scholar: [Author Only Title Only Author and Title](#)

**Yao Y. X., Li M., You C. X., Li Z., Wang D. M., Hao Y. J. (2010). Relationship between malic acid metabolism-related key enzymes and accumulation of malic acid as well as the soluble sugars in apple fruit. Acta Horticulturae Sinica, 37(1): 1-8**

Pubmed: [Author and Title](#)

Google Scholar: [Author Only Title Only Author and Title](#)

**Yoo, S., Cho, Y. H., & Sheen, J. (2007). Arabidopsis mesophyll protoplasts: a versatile cell system for transient gene expression analysis. Nature Protocols, 2(7), 1565-1572.**

Pubmed: [Author and Title](#)

Google Scholar: [Author Only Title Only Author and Title](#)

**Zambito, A. M., & Wolff, J. (1997). Palmitoylation of Tubulin. Biochemical and Biophysical Research Communications, 239(3), 650-654.**

Pubmed: [Author and Title](#)

Google Scholar: [Author Only Title Only Author and Title](#)

**Zeng, Q., Wang, X., & Running, M. P. (2007). Dual lipid modification of Arabidopsis Ggamma-subunits is required for efficient plasma membrane targeting. Plant physiology, 143(3), 1119-1131.**

Pubmed: [Author and Title](#)

Google Scholar: [Author Only Title Only Author and Title](#)

**Zhang, J., Bu, X., Wang, H., Zhu, Y., Geng, Y., Nihira, N. T., ... & Wei, W. (2018). Cyclin D-CDK4 kinase destabilizes PD-L1 via cullin 3-SPOP to control cancer immune surveillance. Nature, 553(7686), 91-95.**

Pubmed: [Author and Title](#)

Google Scholar: [Author Only Title Only Author and Title](#)

**Zhang, X., Mi, Y., Mao, H., Liu, S., Chen, L., & Qin, F. (2019). Genetic variation in ZmTIP1 contributes to root hair elongation and drought tolerance in maize. Plant Biotechnology Journal, .**

Pubmed: [Author and Title](#)

Google Scholar: [Author Only Title Only Author and Title](#)

**Zhou, F., Xue, Y., Yao, X., & Xu, Y. (2006). CSS-Palm: palmitoylation site prediction with a clustering and scoring strategy (CSS). Bioinformatics, 22(7), 894-896.**

Pubmed: [Author and Title](#)

Google Scholar: [Author Only Title Only Author and Title](#)

**Zhou, L., Li, S., Feng, Q., Zhang, Y., Zhao, X., Zeng, Y., ... & Zhang, Y. (2013). PROTEIN S-ACYL TRANSFERASE10 Is Critical for Development and Salt Tolerance in Arabidopsis. *The Plant Cell*, 25(3), 1093-1107.**

Pubmed: [Author and Title](#)

Google Scholar: [Author Only Title Only Author and Title](#)
